# Supplementary material for: Silica-supported 5-(pyrrolidin-2-yl)tetrazole: development of organocatalytic processes from batch to continuous-flow conditions
Source: Royal Society of Chemistry journal article supplement (doi:10.1039/c2gc16673a), 2012-01-01
Supplement: c2gc16673a.pdf [file c2gc16673a.pdf]

## Silica-supported 5-(pyrrolidin-2-yl)tetrazole: development of organocatalytic processes from batch to continuous-flow conditions

Olga Bortolini,<sup>a</sup> Lorenzo Caciolli,<sup>a</sup> Alberto Cavazzini,<sup>b,\*</sup> Valentina Costa,<sup>b</sup> Roberto Greco,<sup>b</sup>  
Alessandro Massi,<sup>a,\*</sup> and Luisa Pasti<sup>b</sup>

<sup>a</sup>*Dipartimento di Chimica, Laboratorio di Chimica Organica, Università di Ferrara, Via L. Borsari 46, I-44121 Ferrara (Italy): Fax: (+)39 0532 455183. Phone: (+)39 0532 455183. E-mail: [alessandro.massi@unife.it](mailto:alessandro.massi@unife.it)*

<sup>b</sup>*Dipartimento di Chimica, Laboratorio di Chimica Analitica, Università di Ferrara: Fax: (+)39 0532 455133. Phone: (+)39 0532 455133. E-mail: [alberto.cavazzini@unife.it](mailto:alberto.cavazzini@unife.it)*

### Electronic supplementary information

#### Table of content:

|                                                                     |     |
|---------------------------------------------------------------------|-----|
| <sup>1</sup> H and <sup>13</sup> C NMR of new compounds <b>7-13</b> | S2  |
| FT-IR spectra of silica <b>2-4</b>                                  | S16 |
| Chiral HPLC chromatograms                                           | S19 |

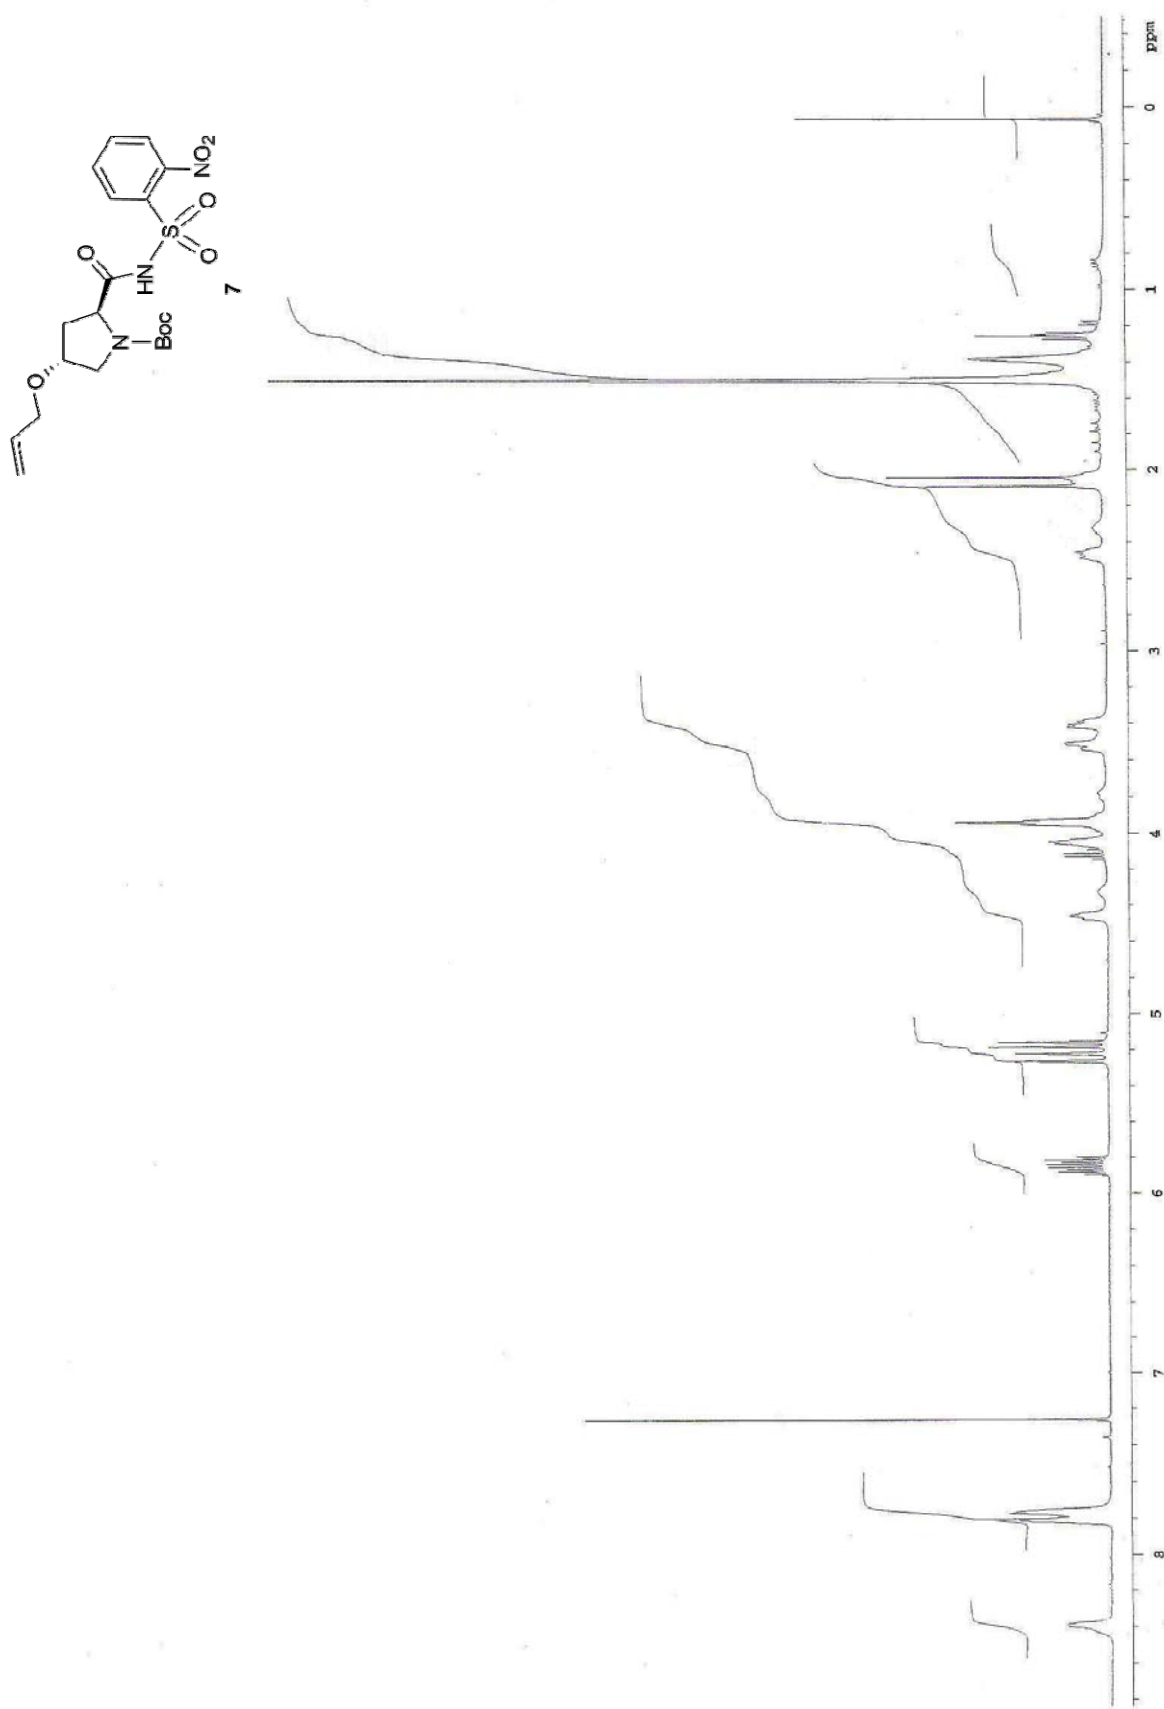

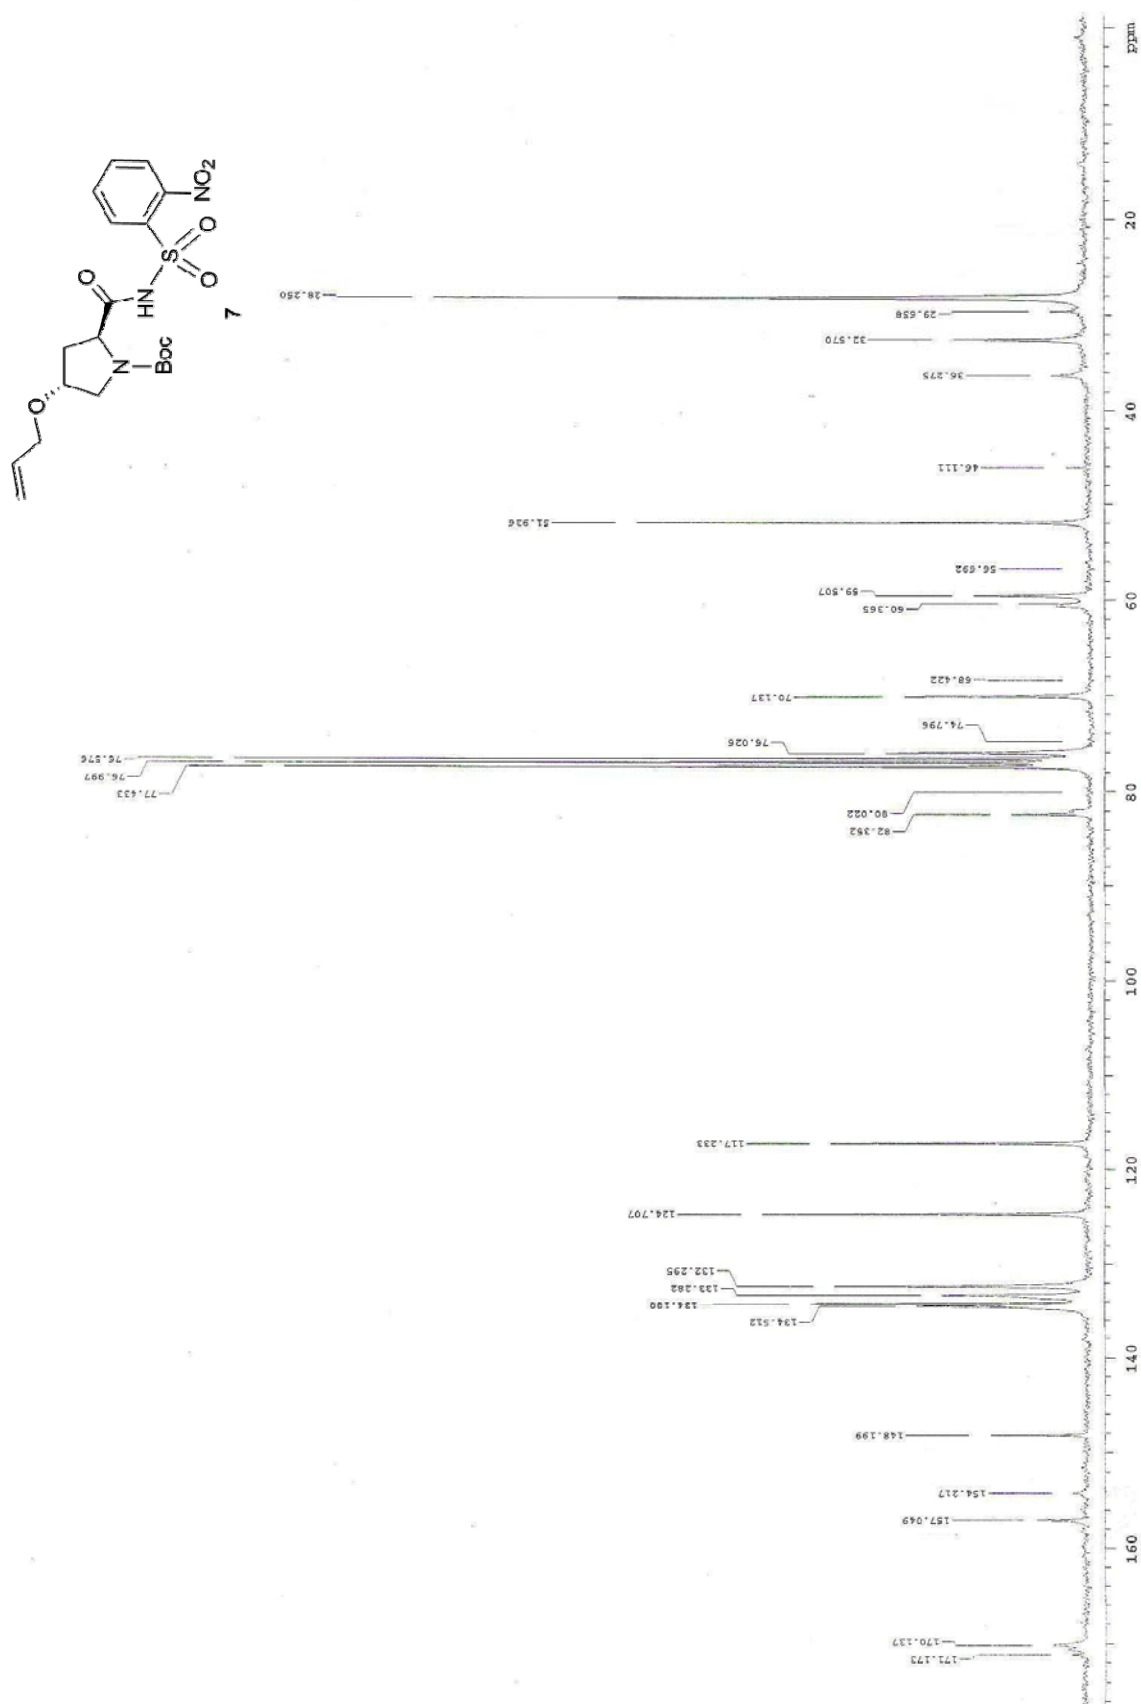

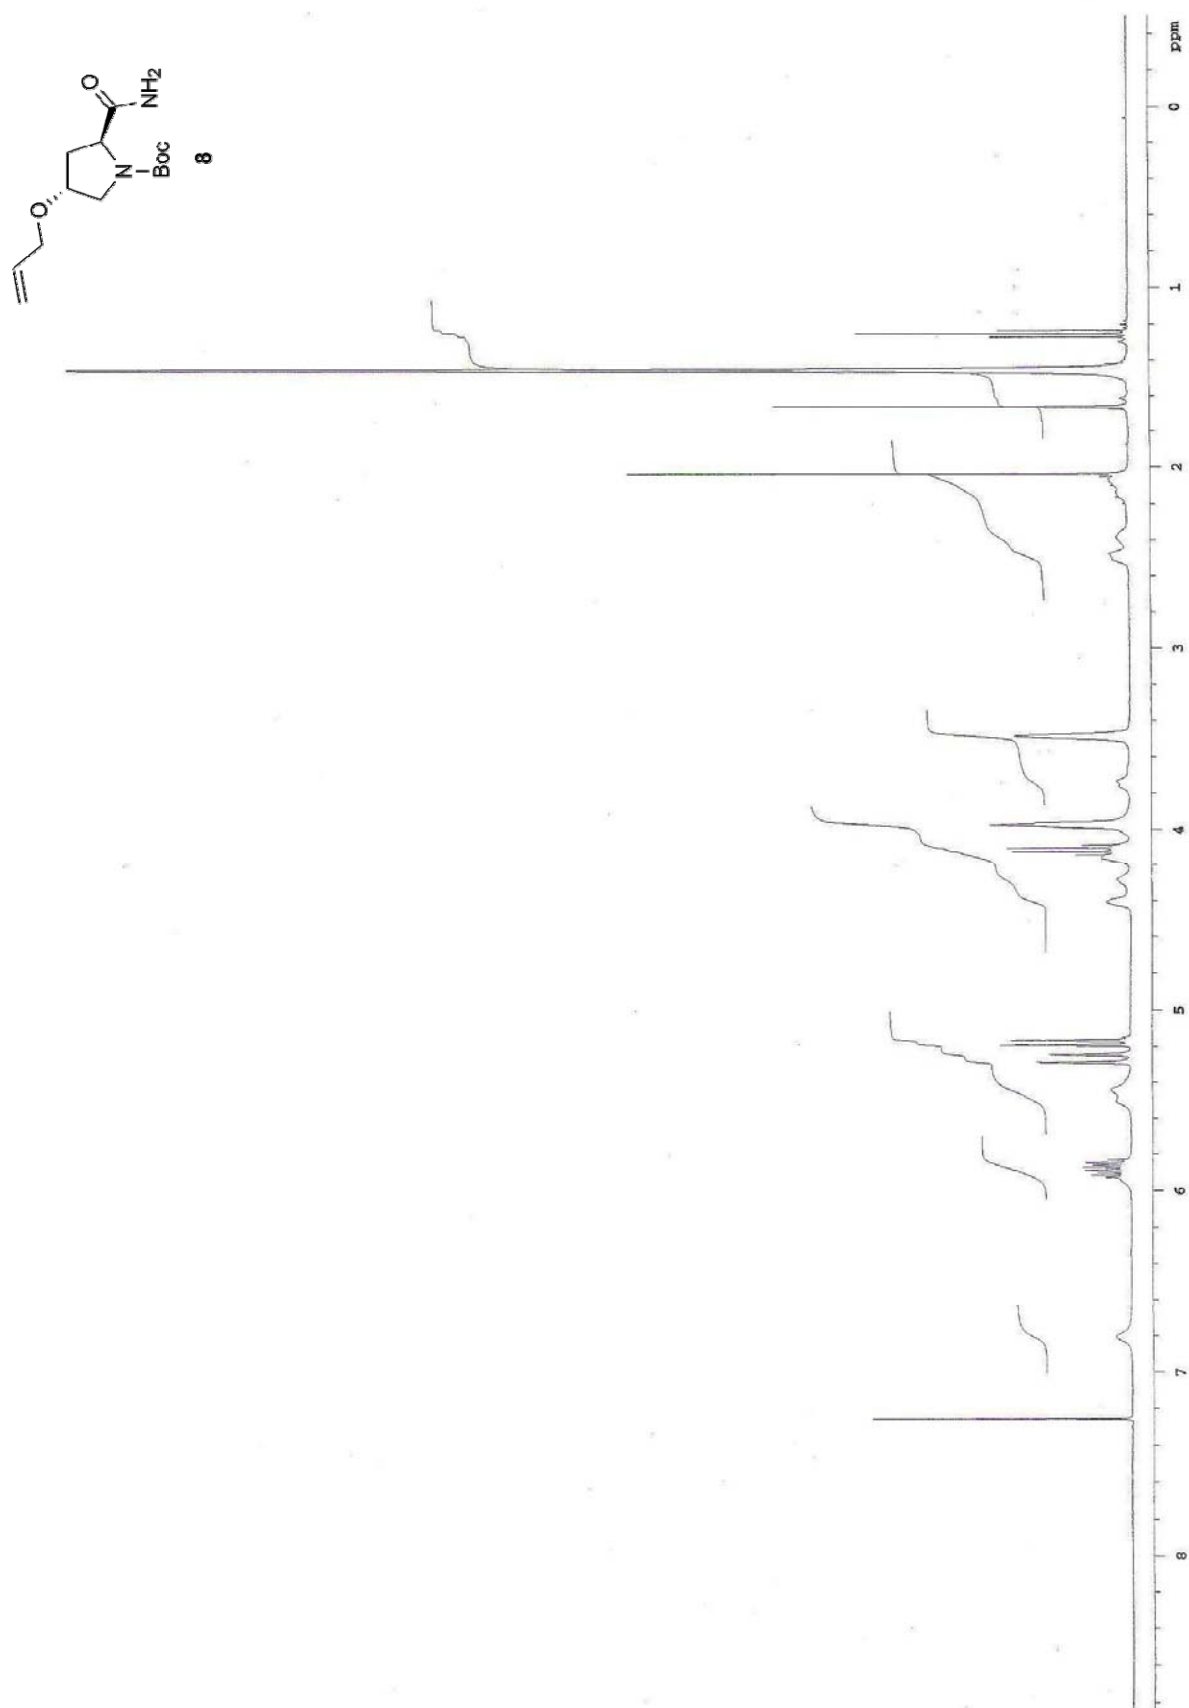

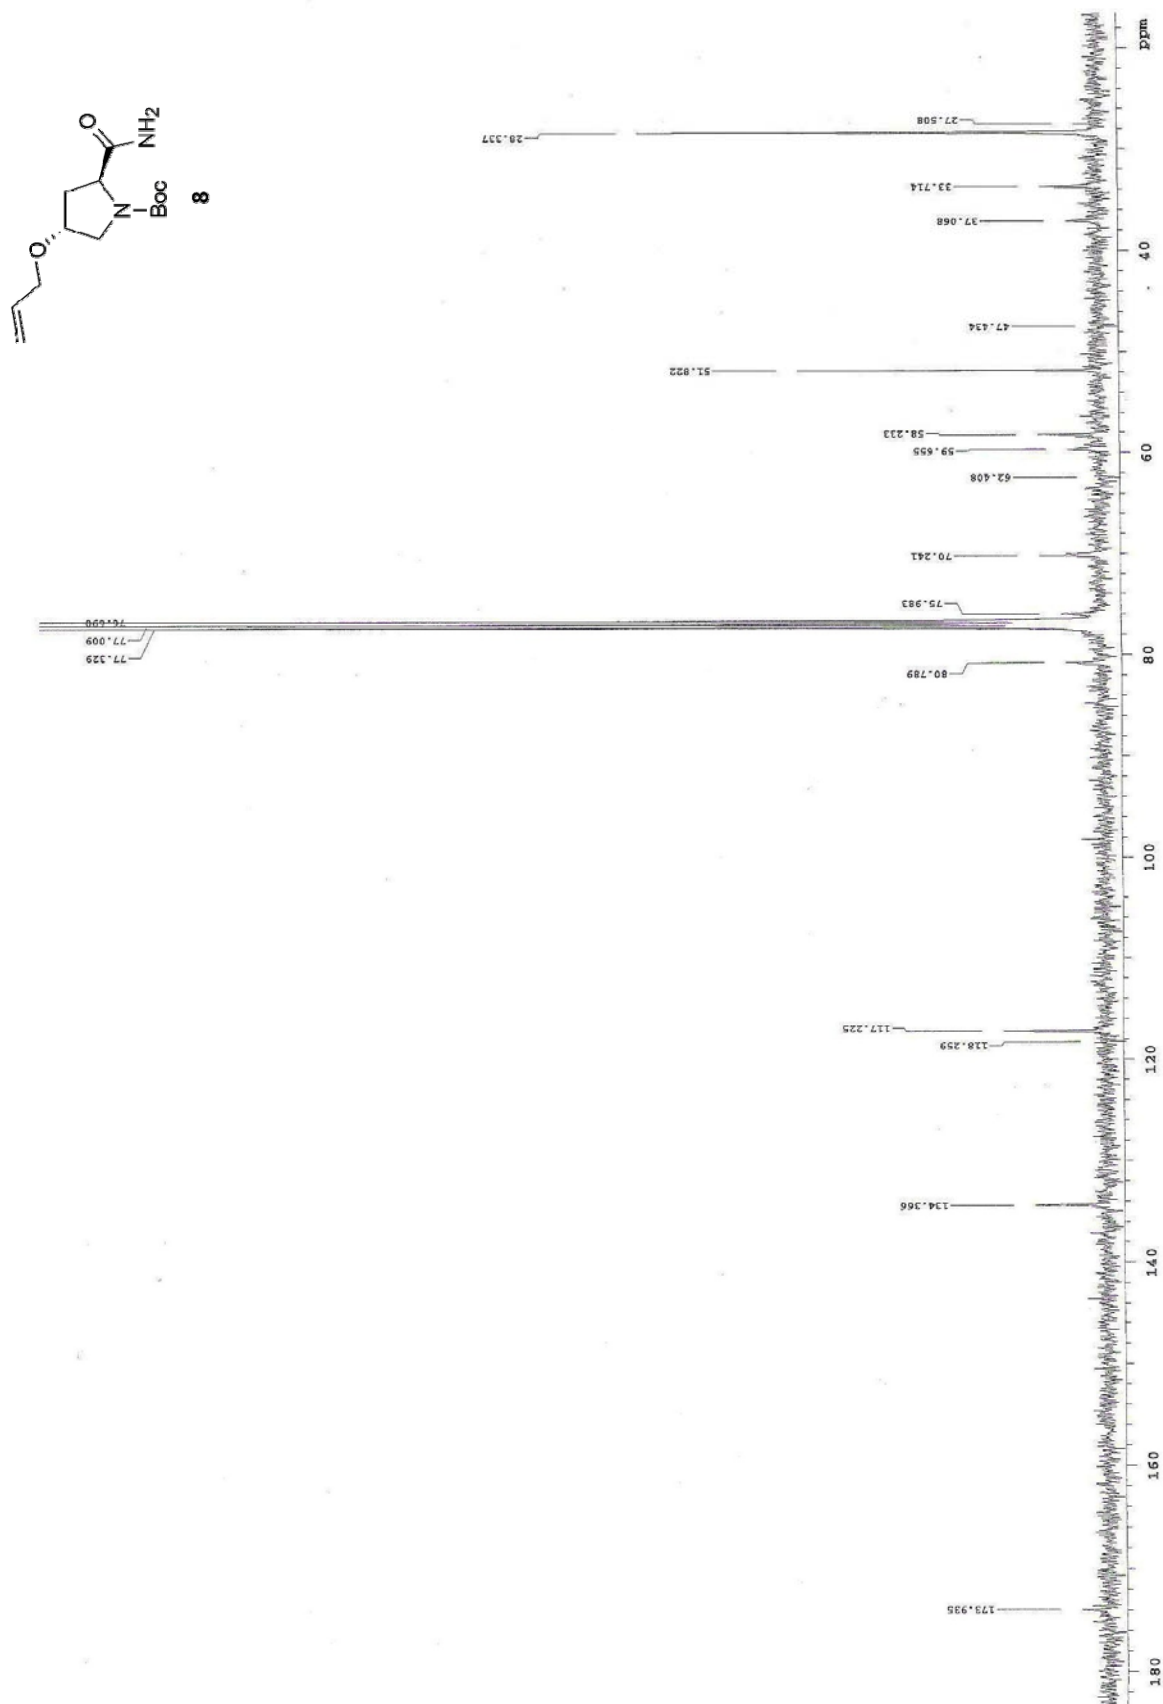

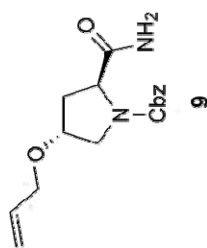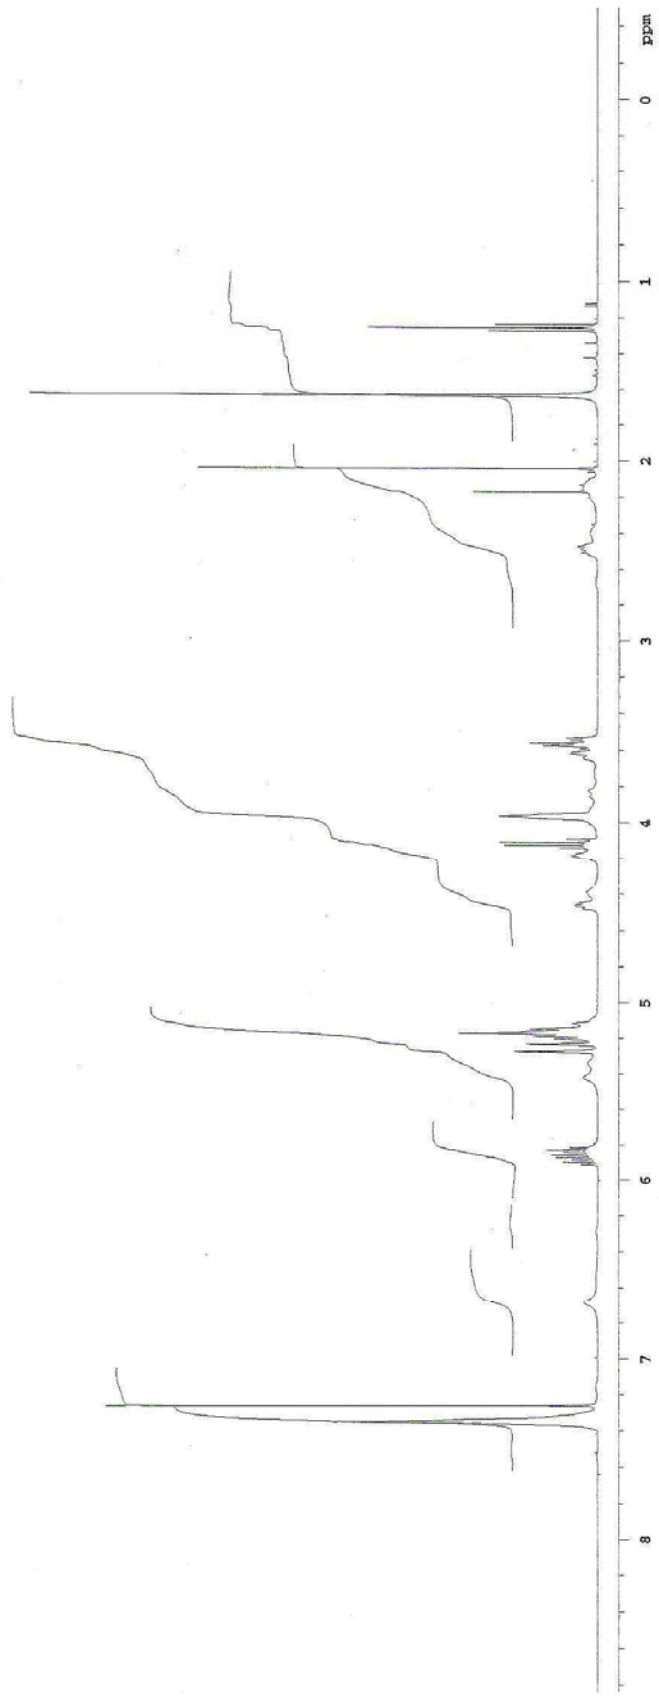

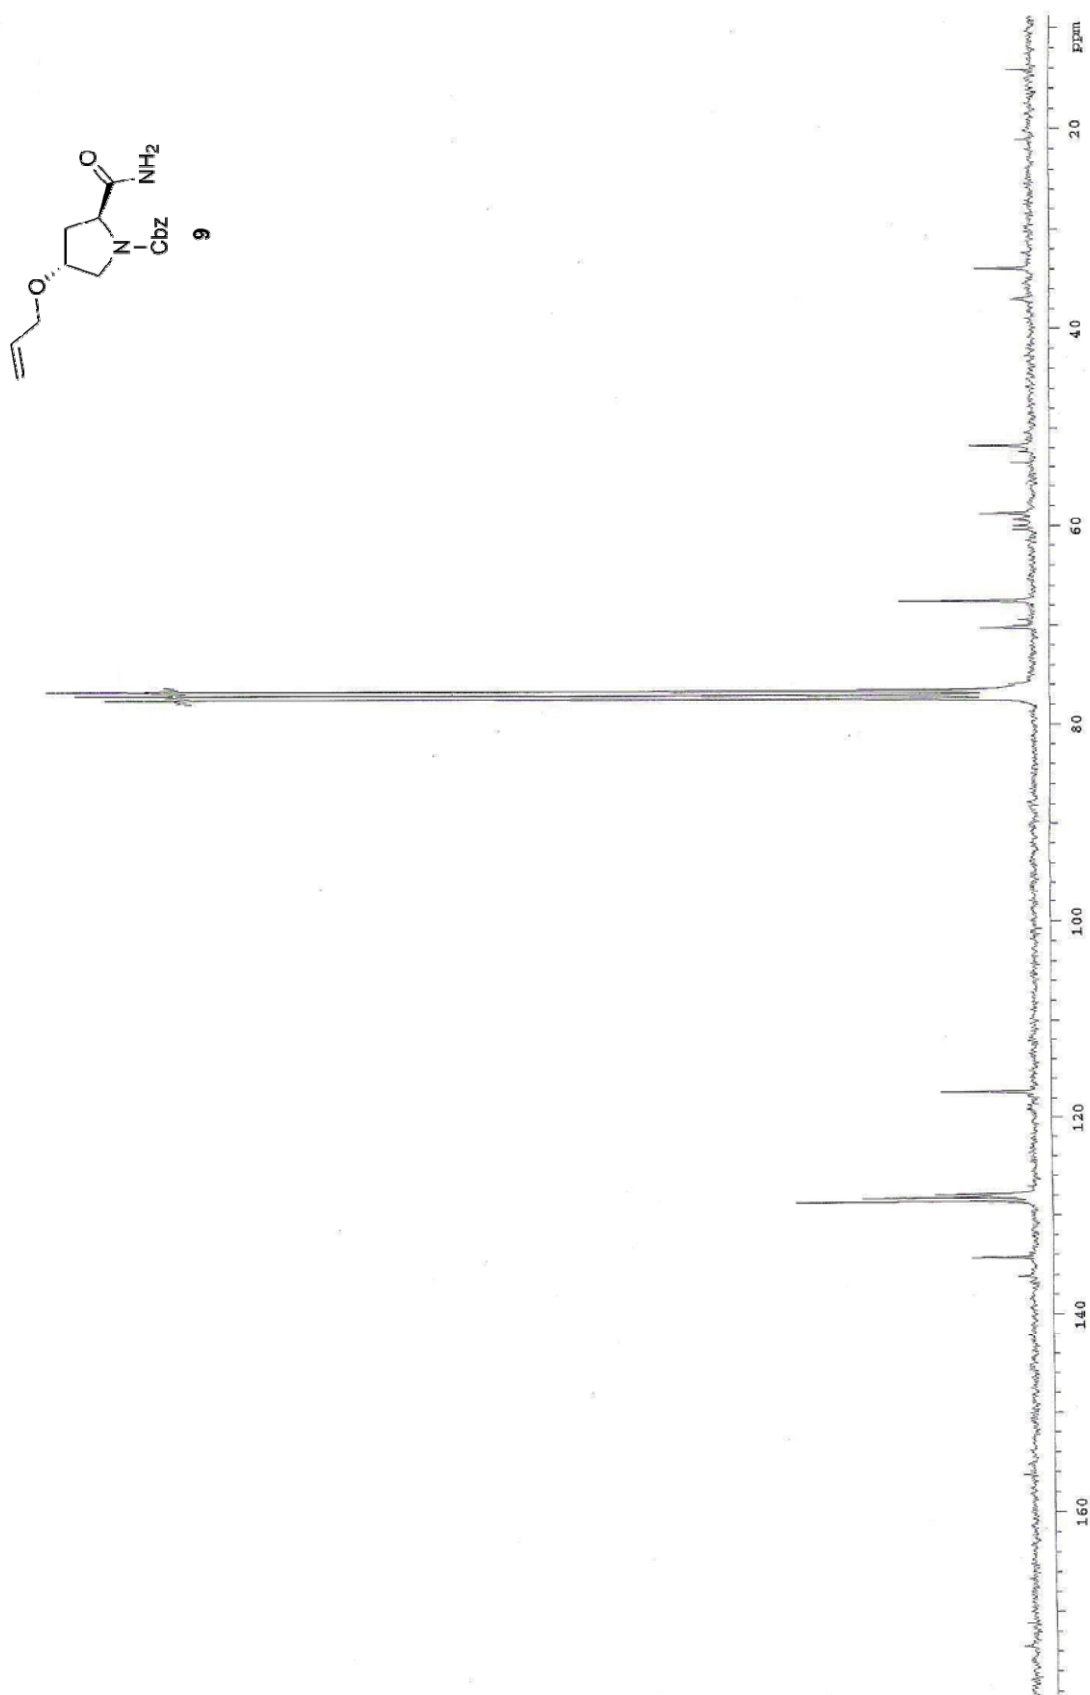

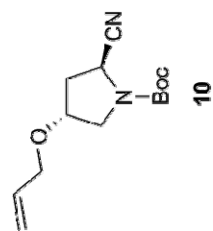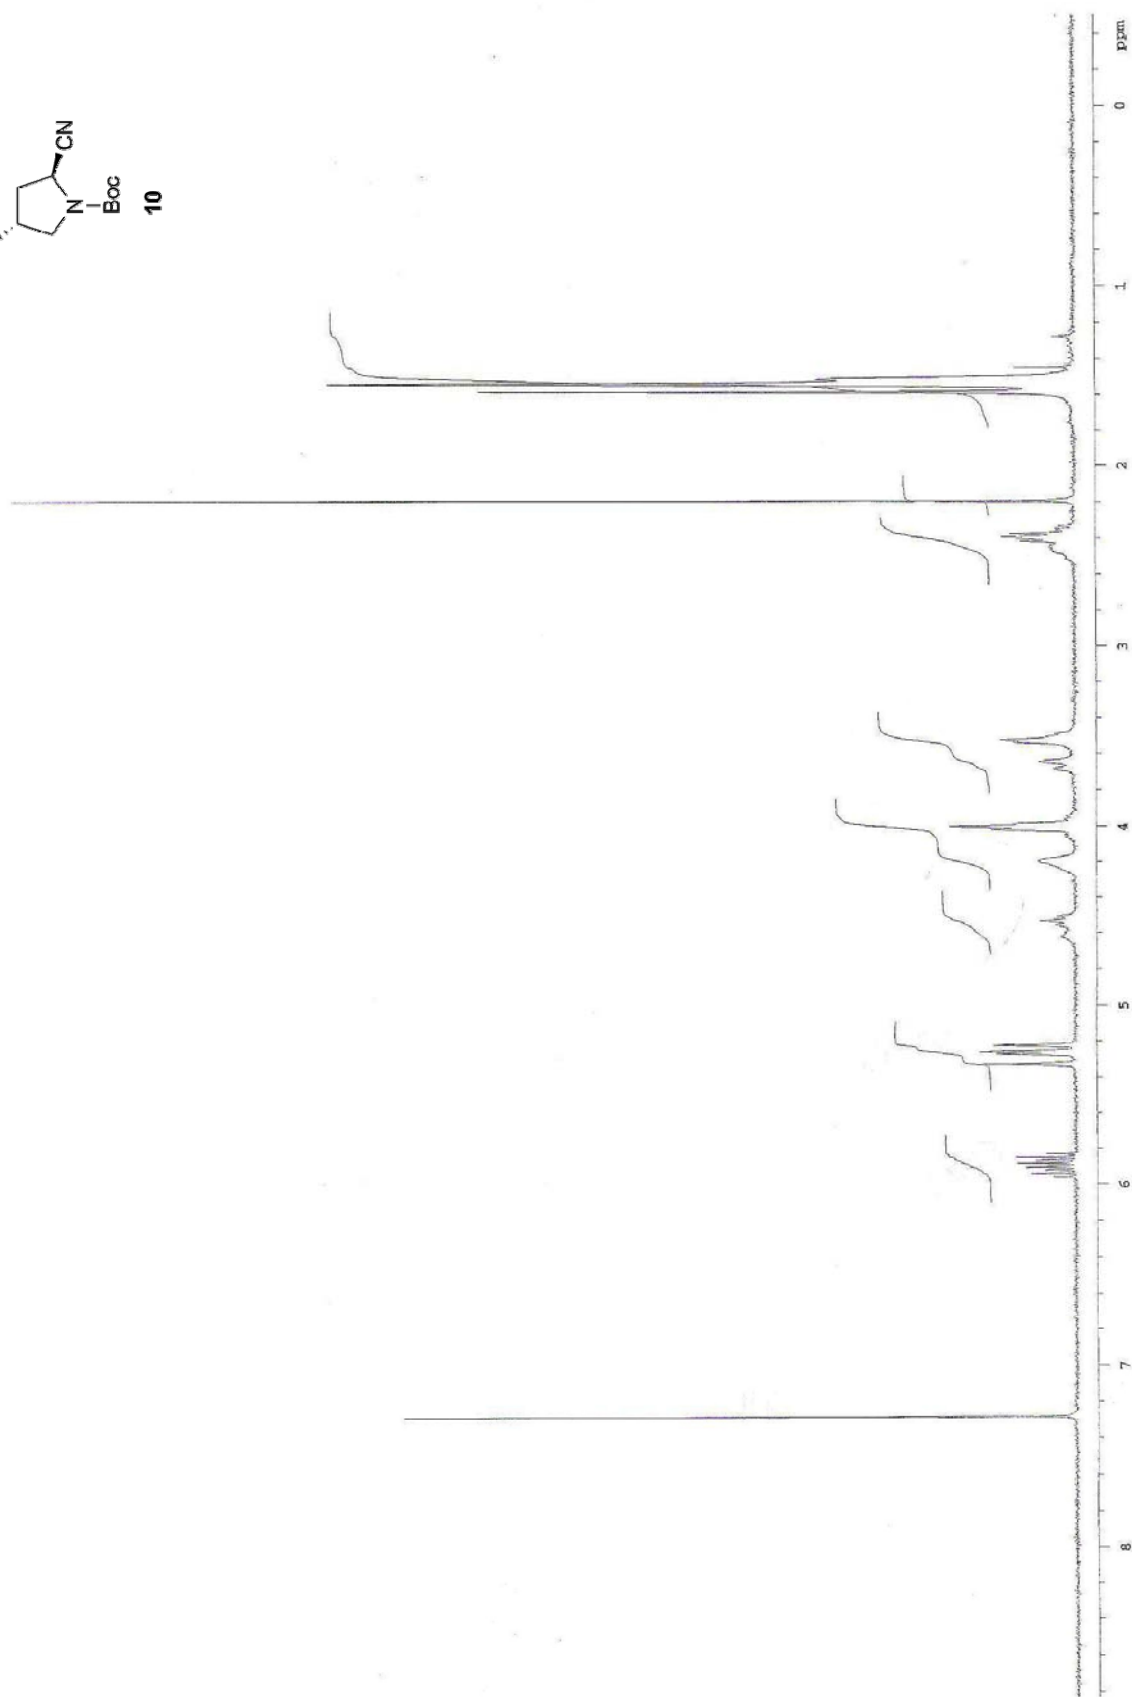



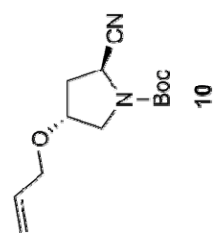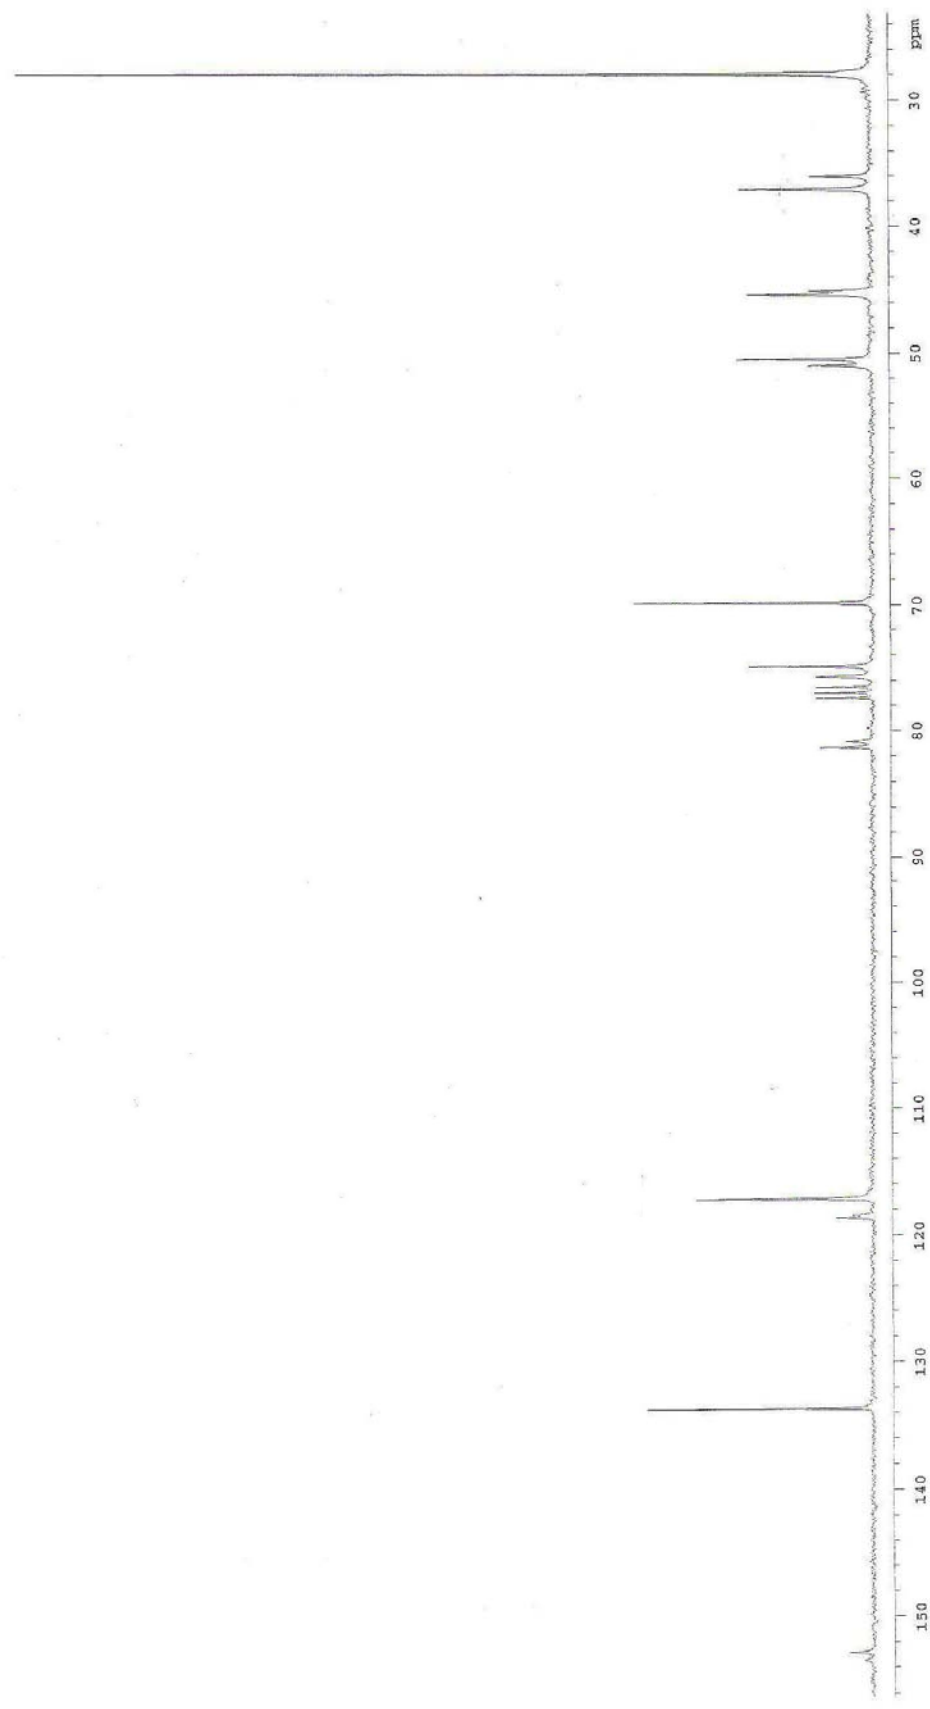

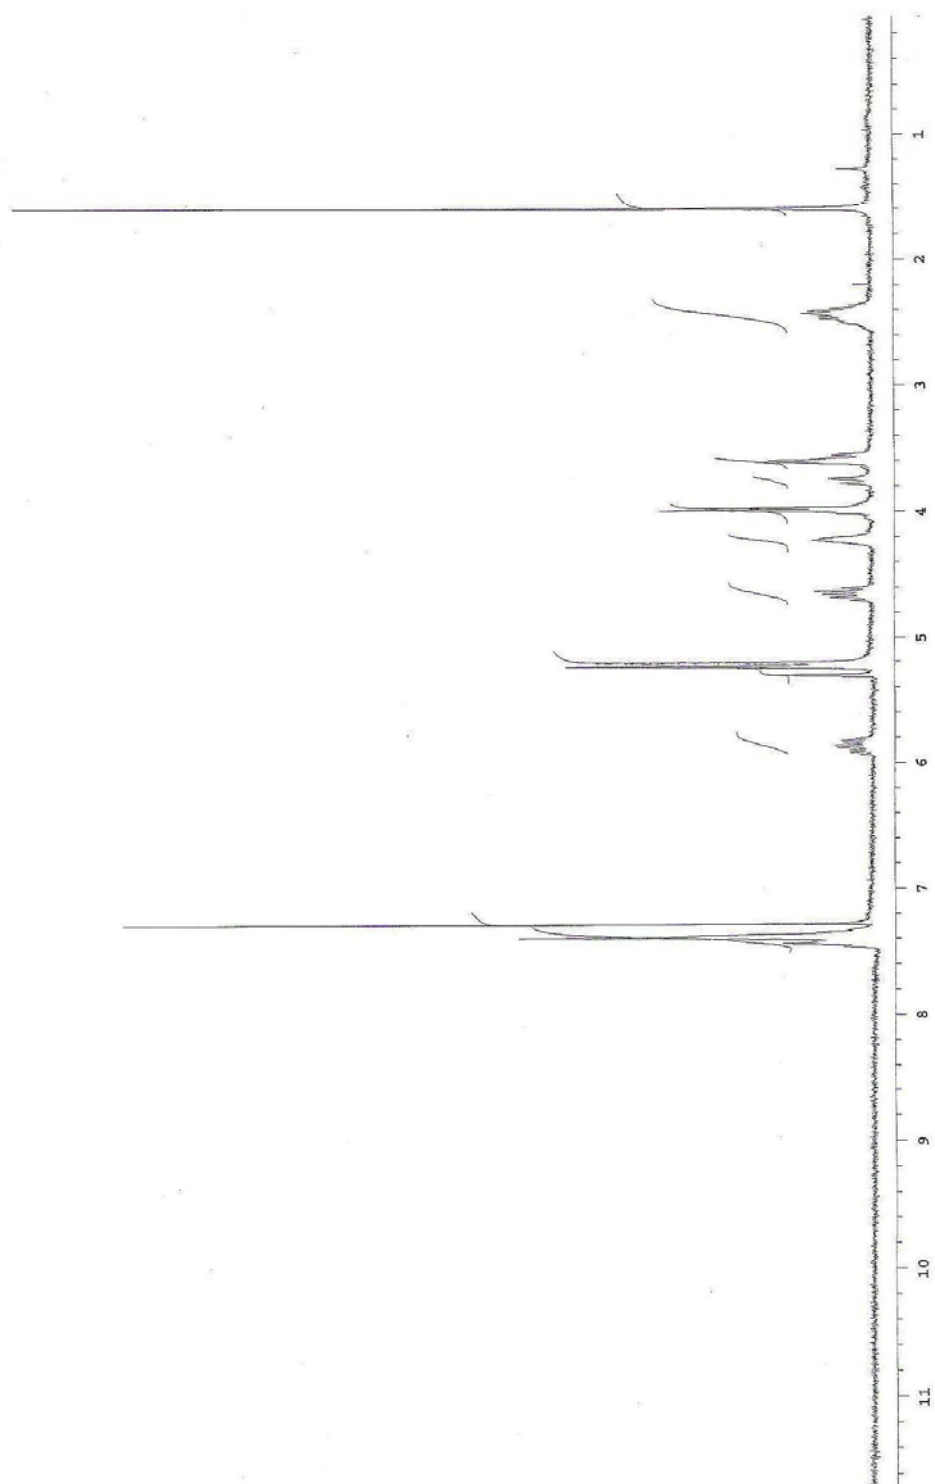

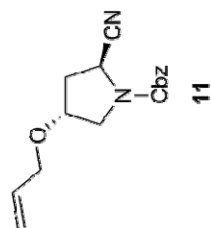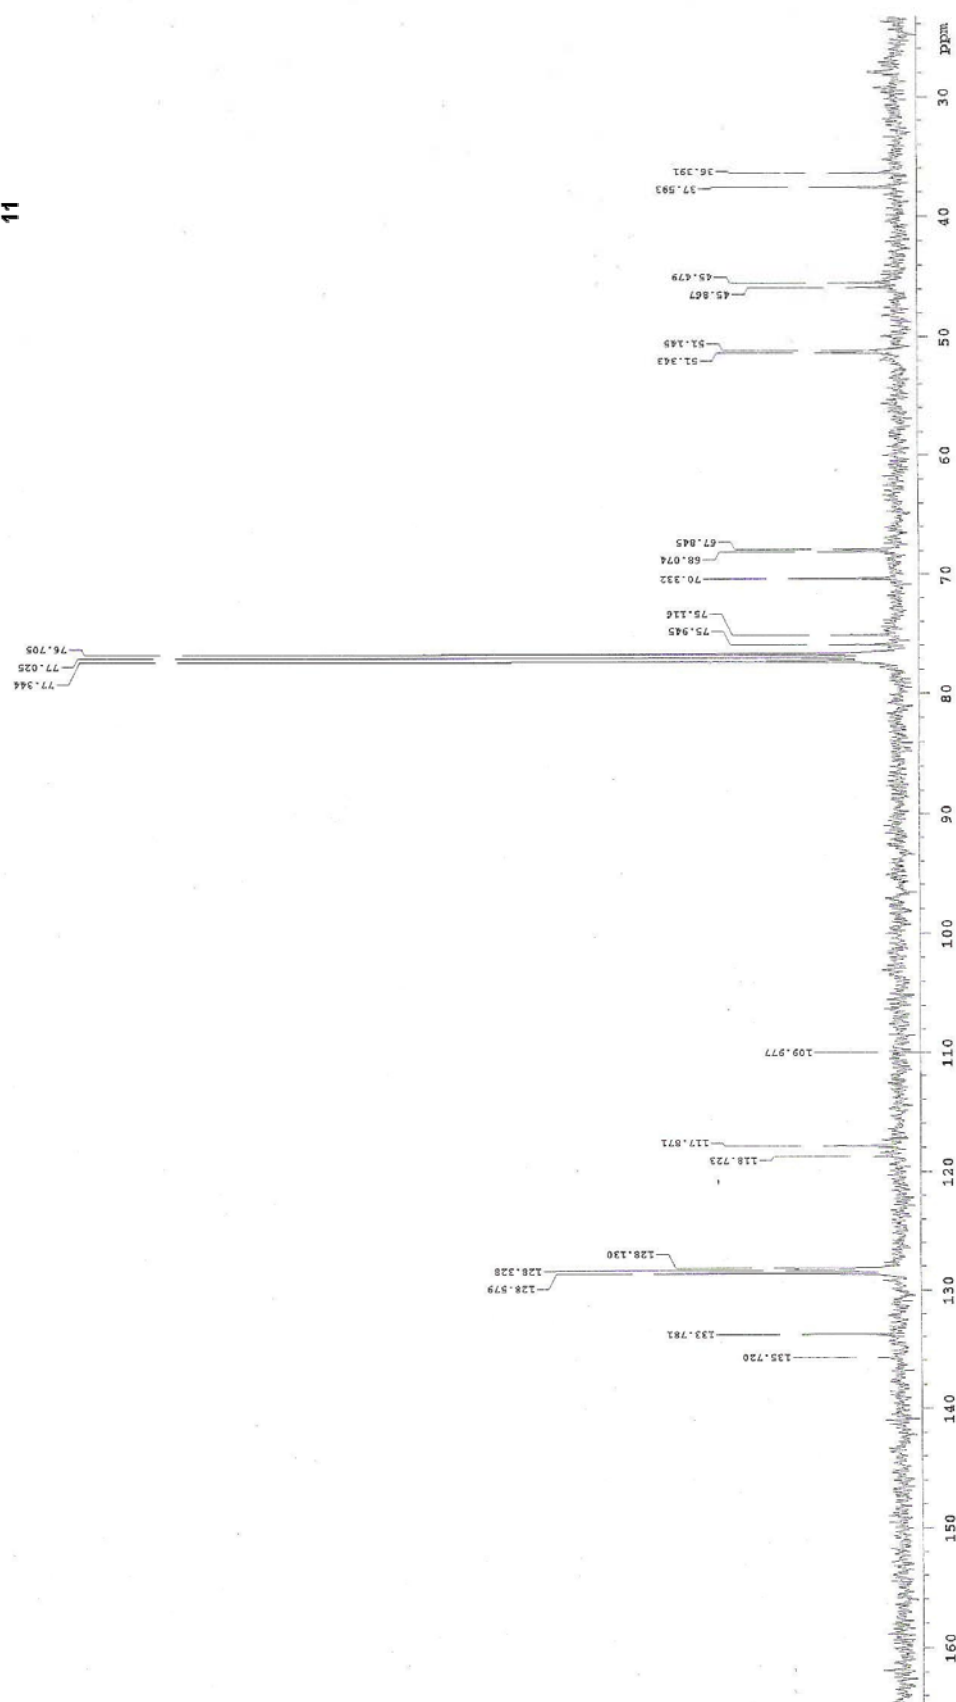

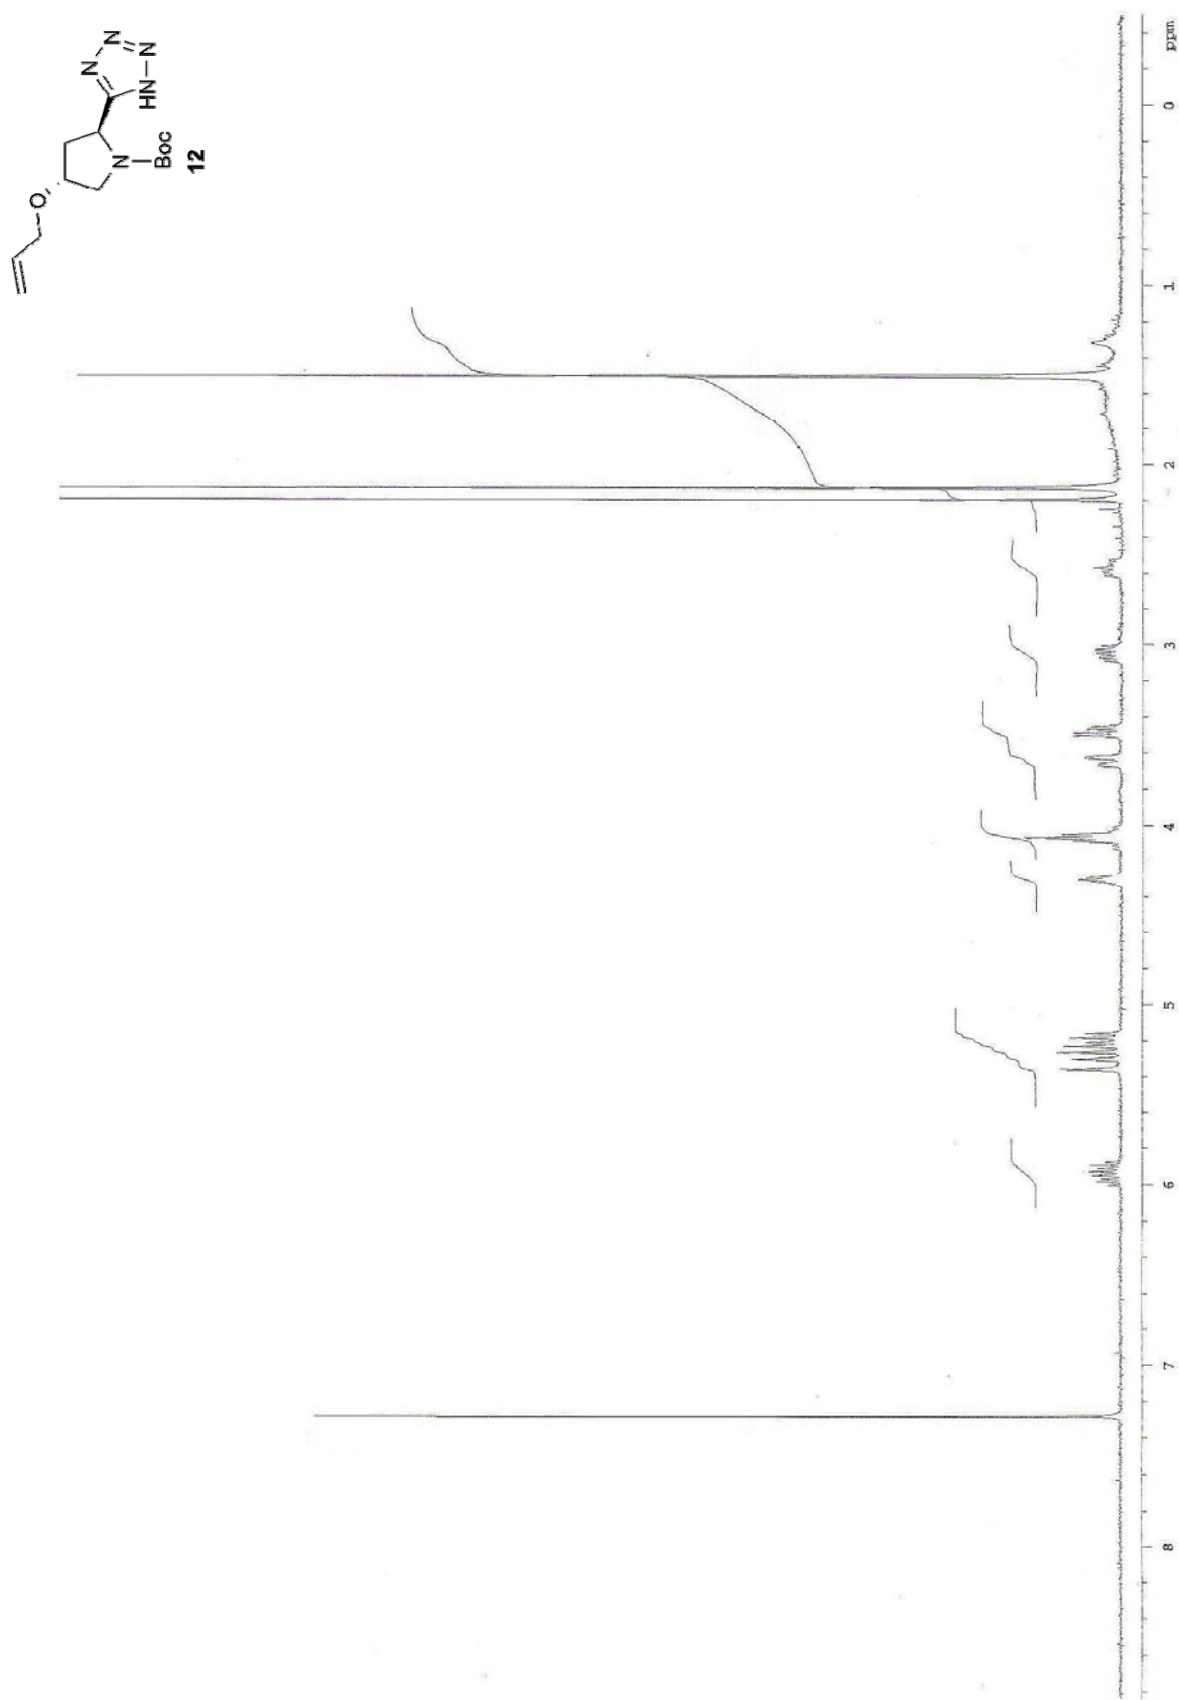

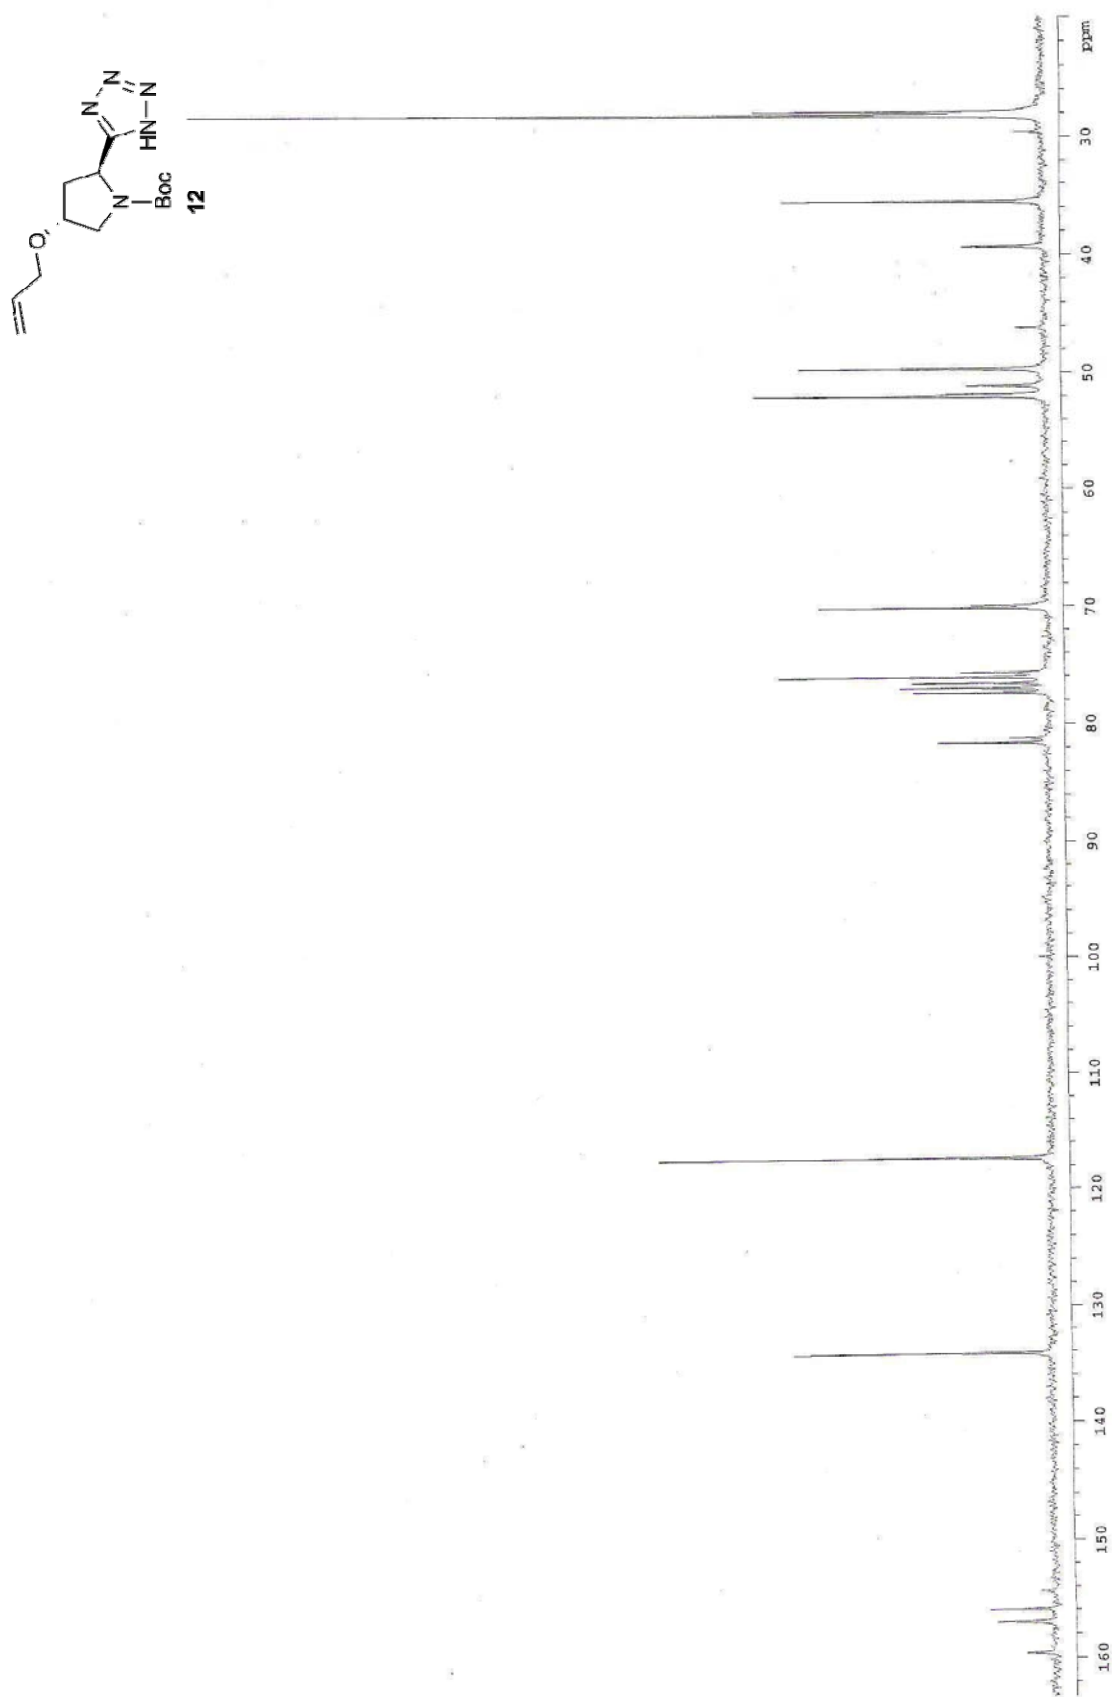

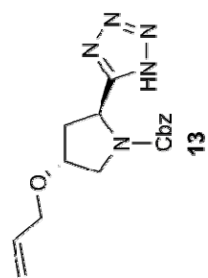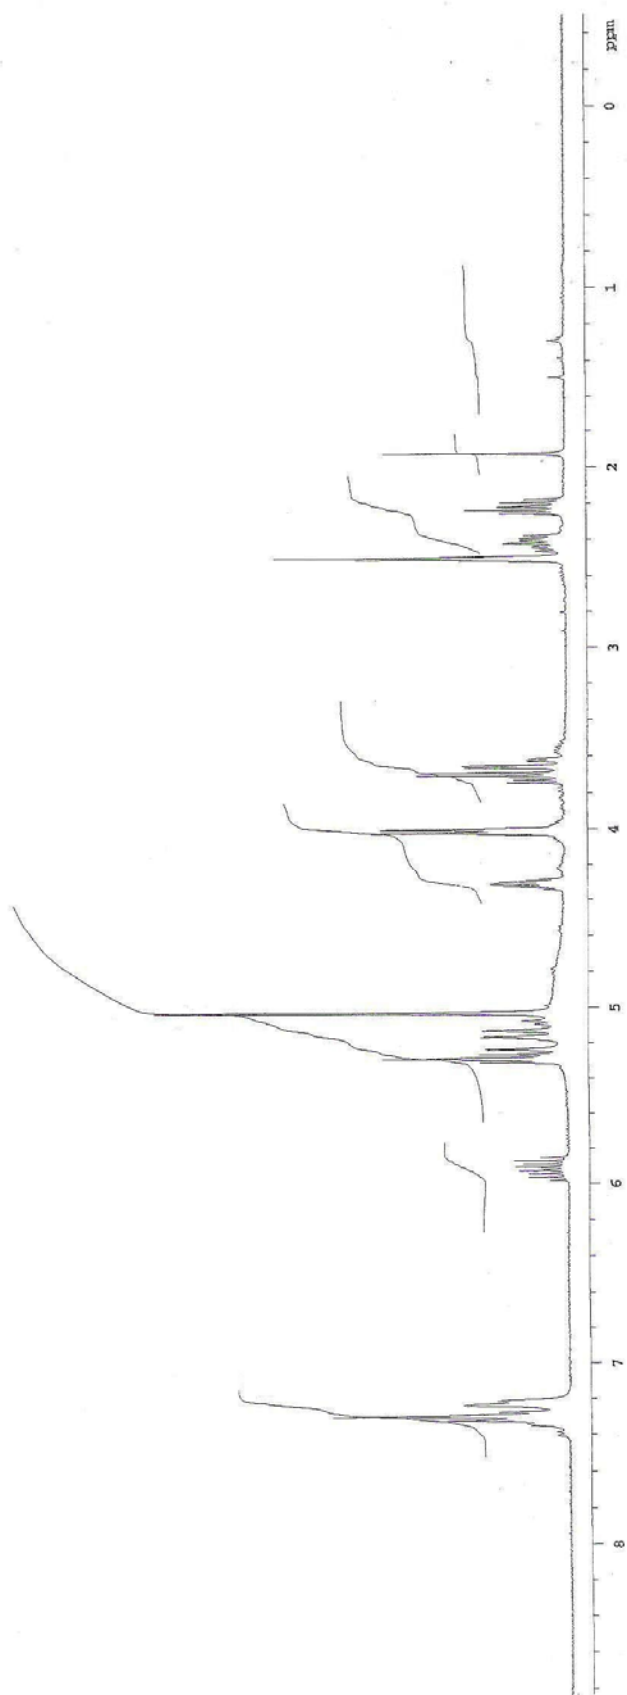

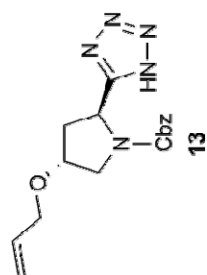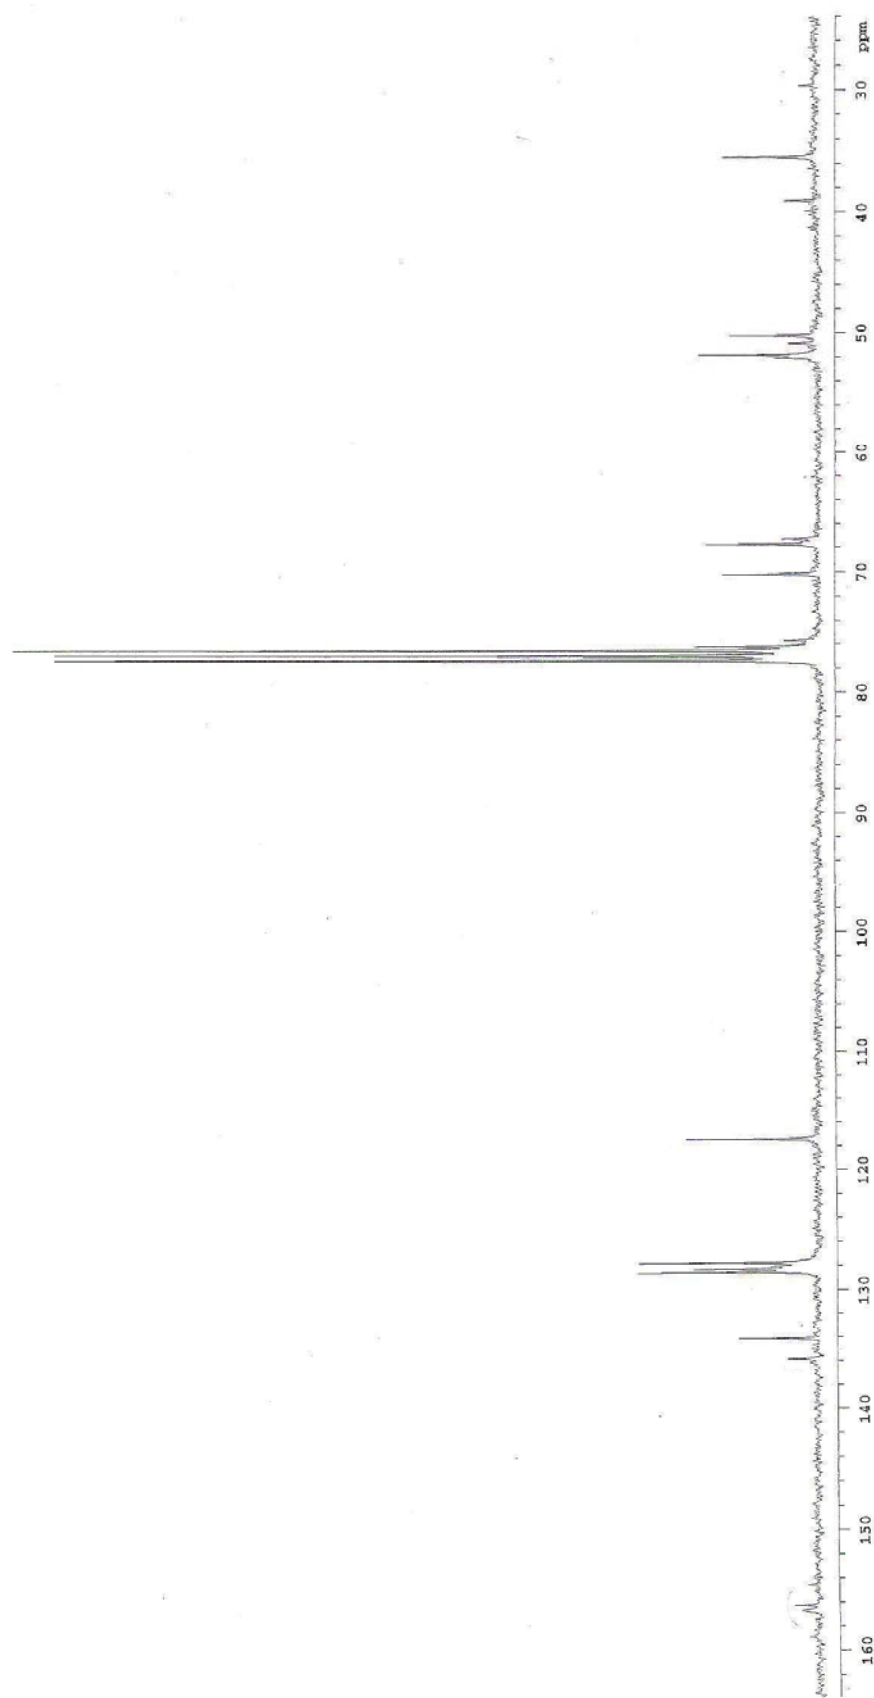

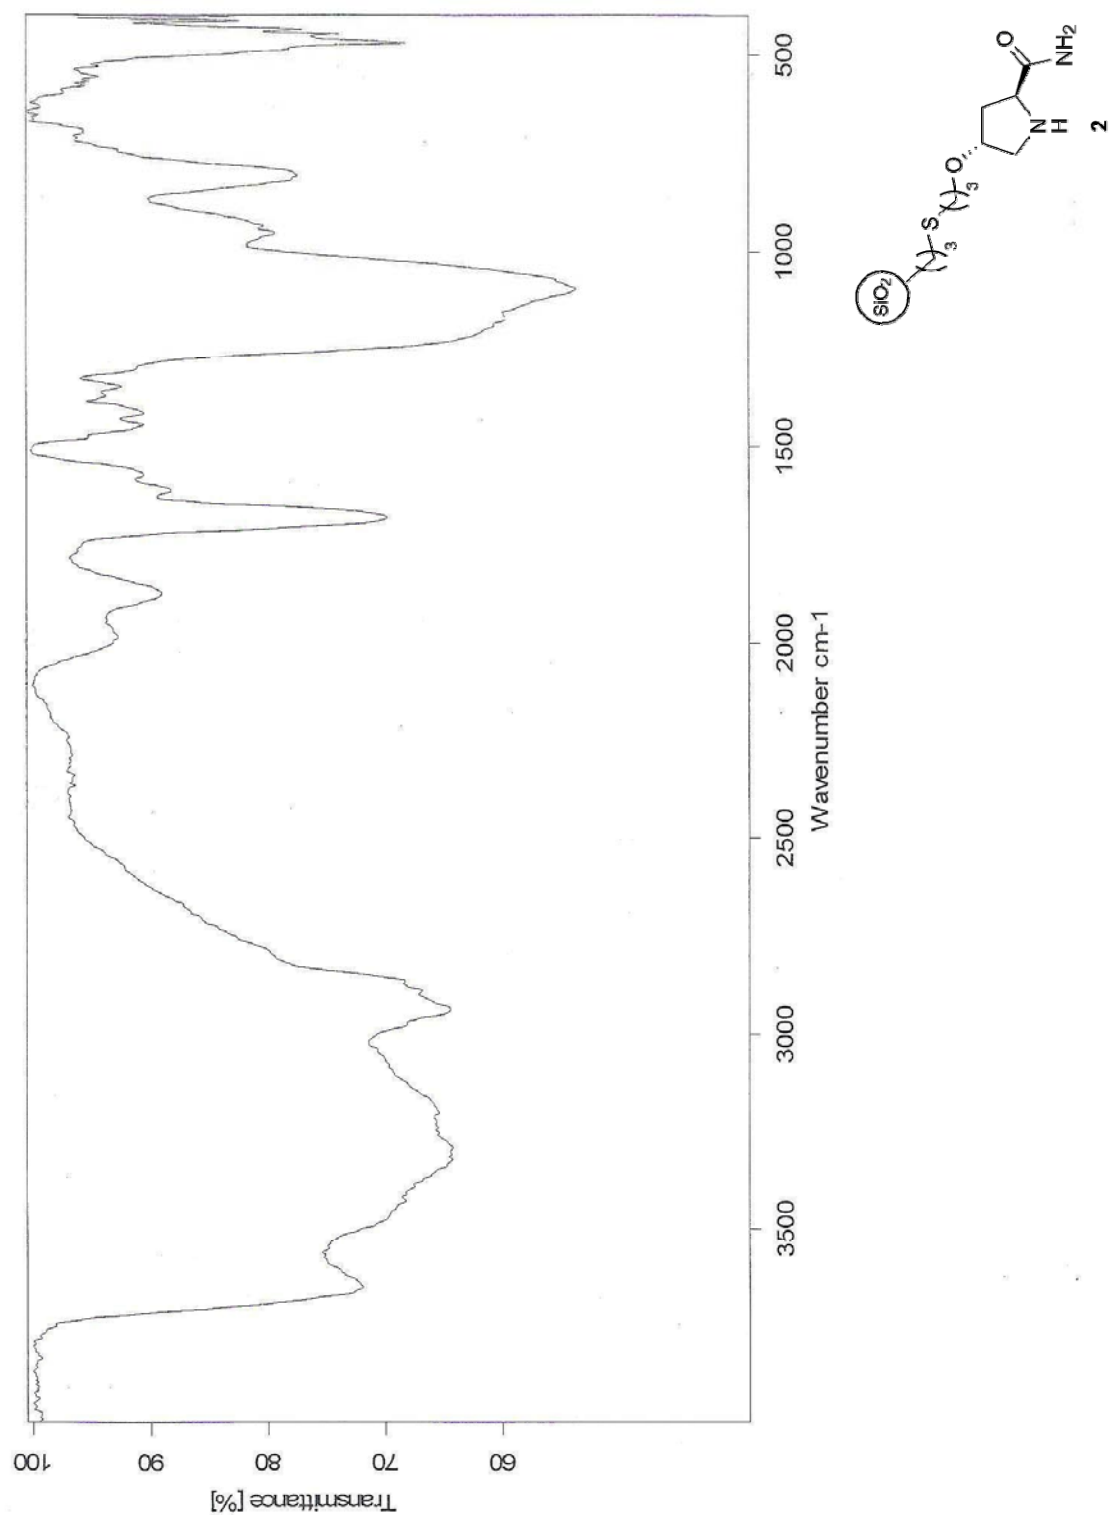



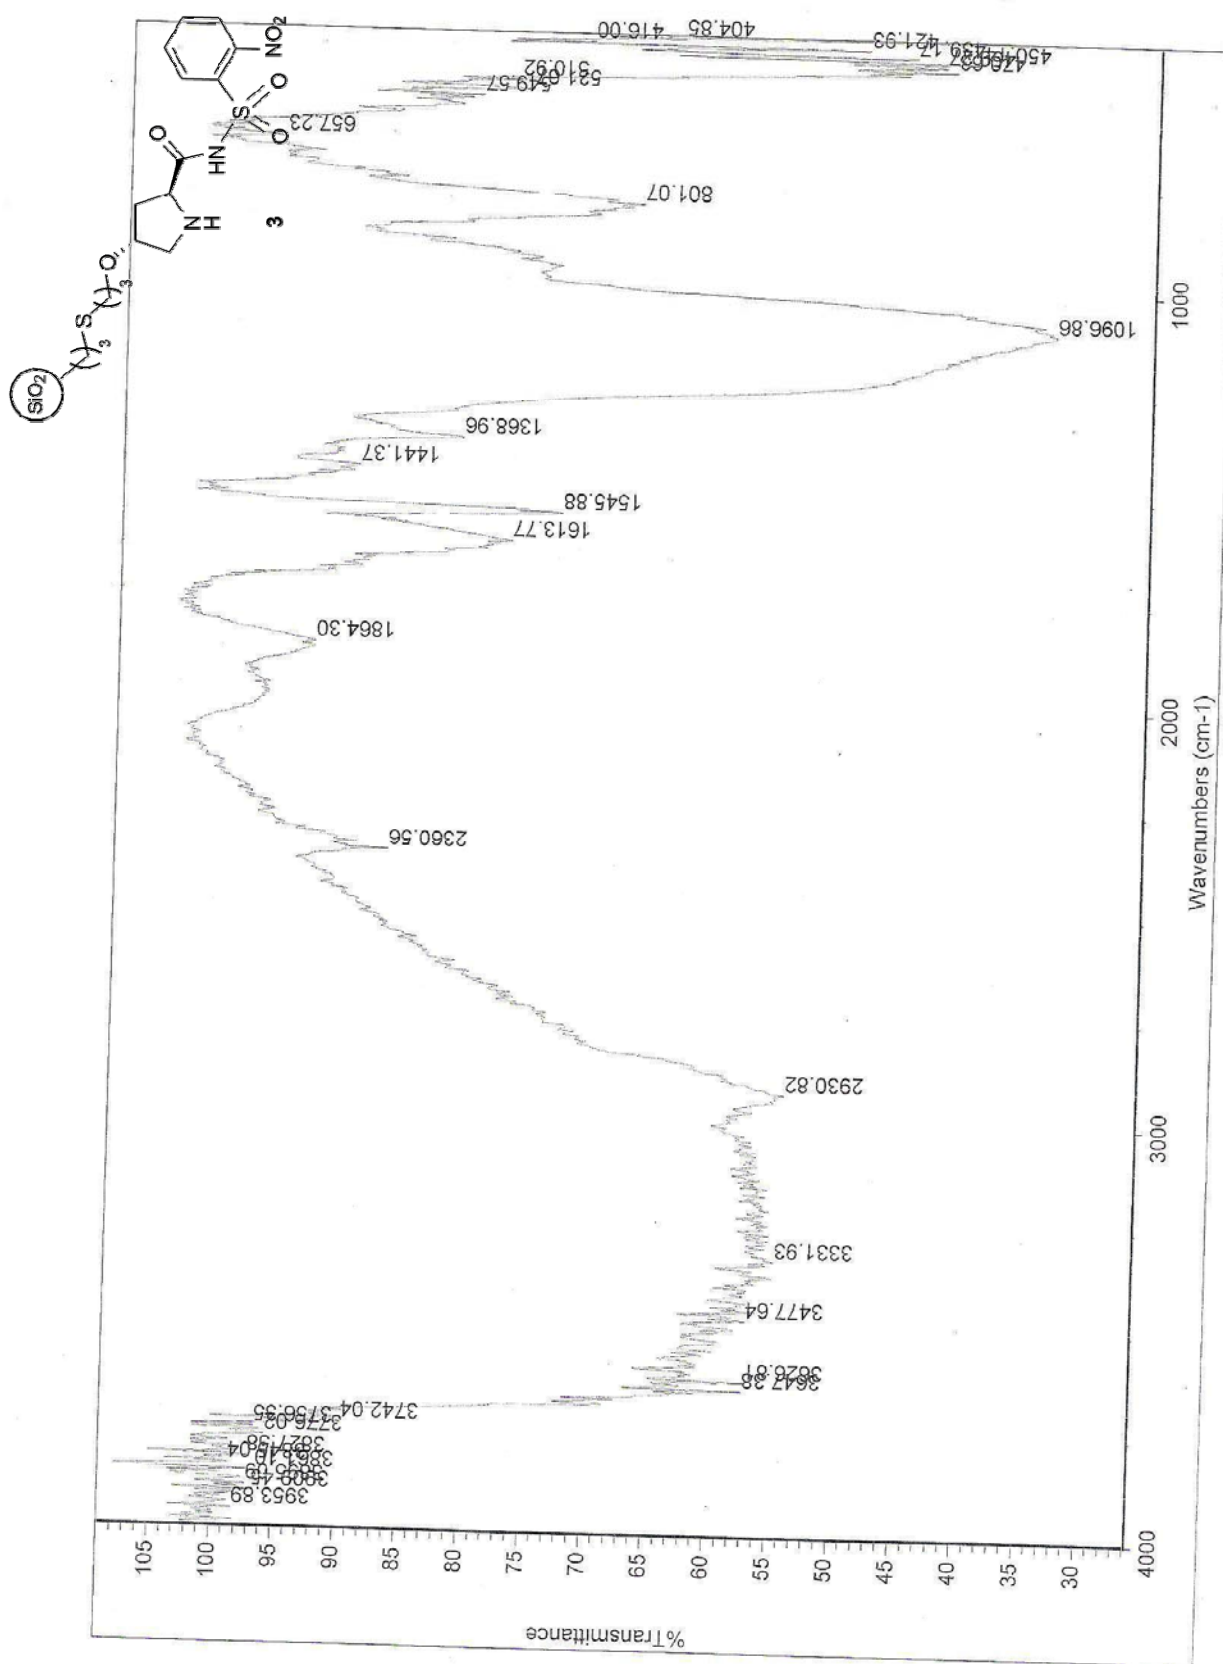

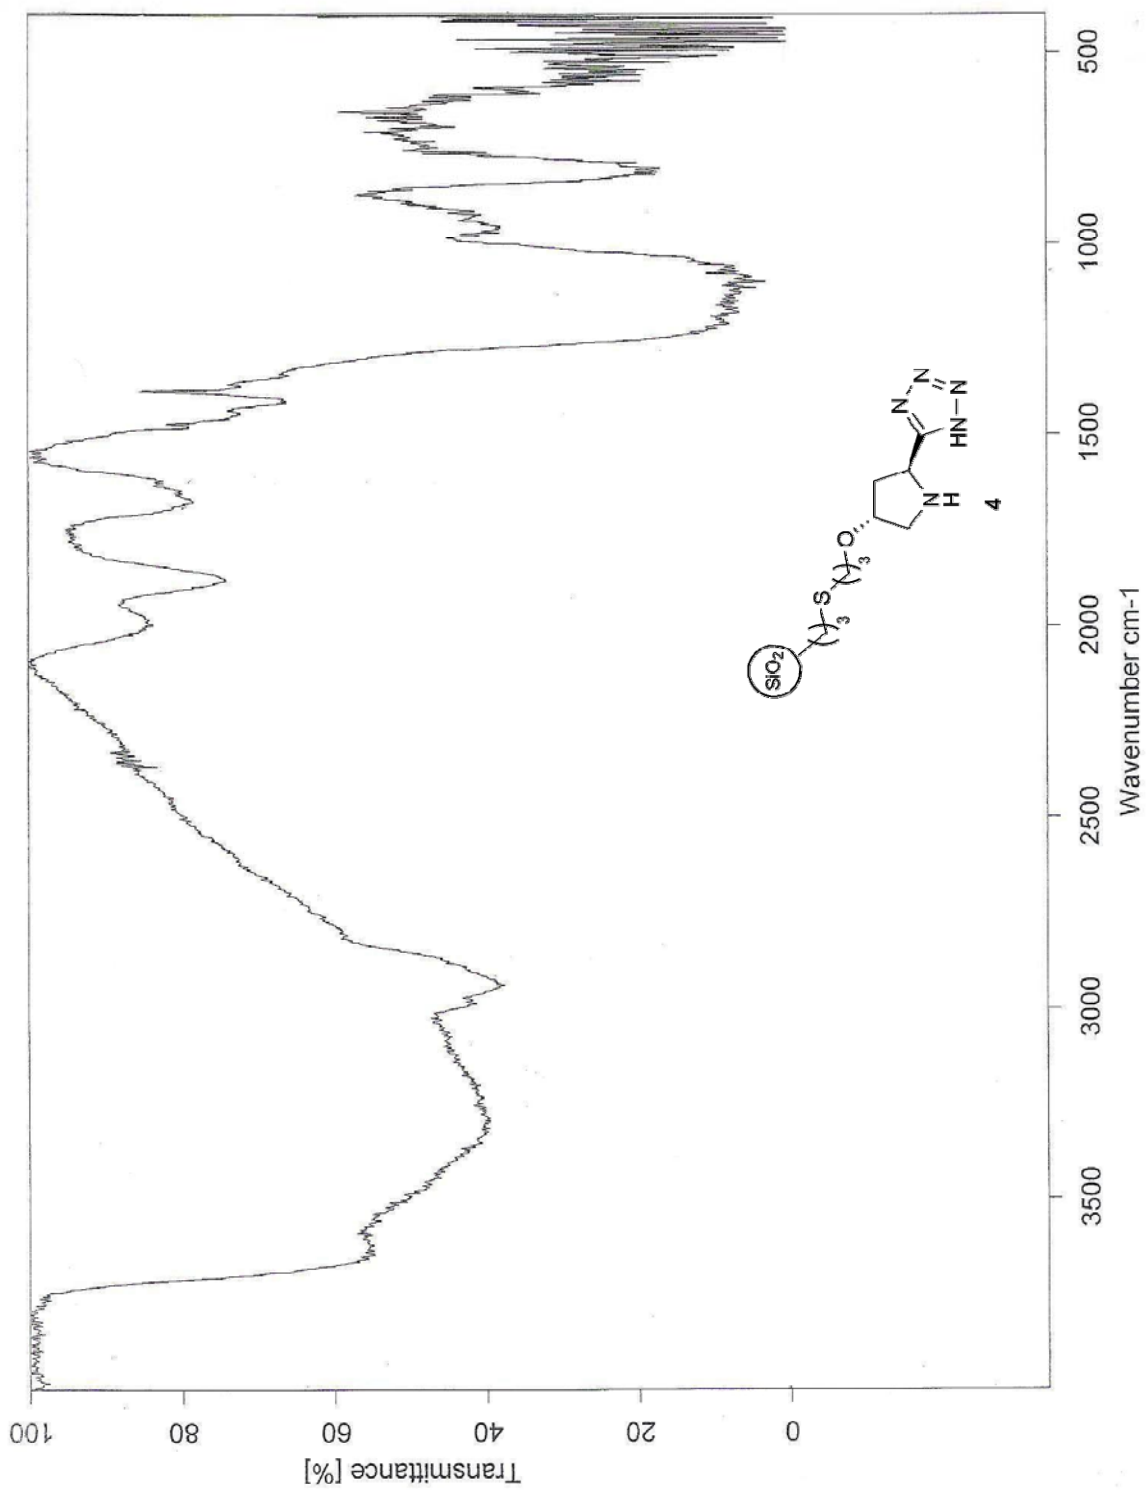

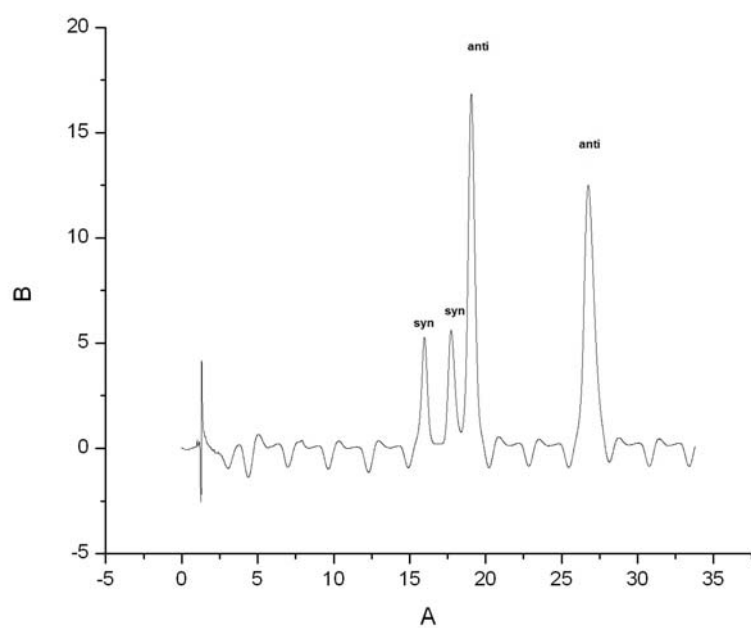

**17a racemic**

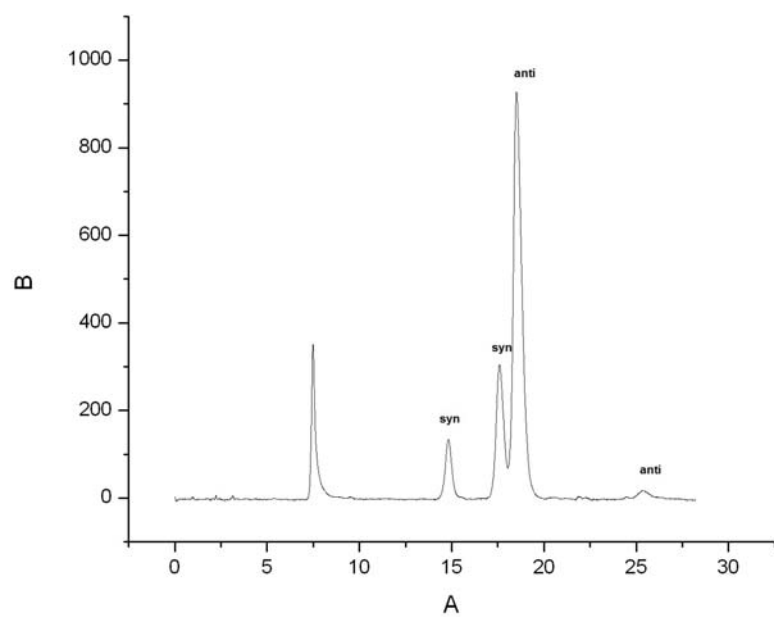

**17a (Table 2, entry 1)**

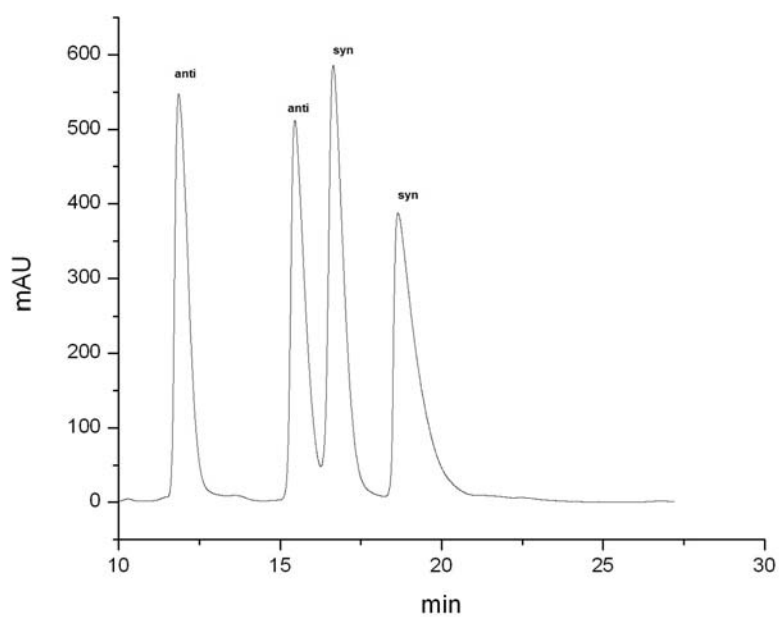

**18 racemic**

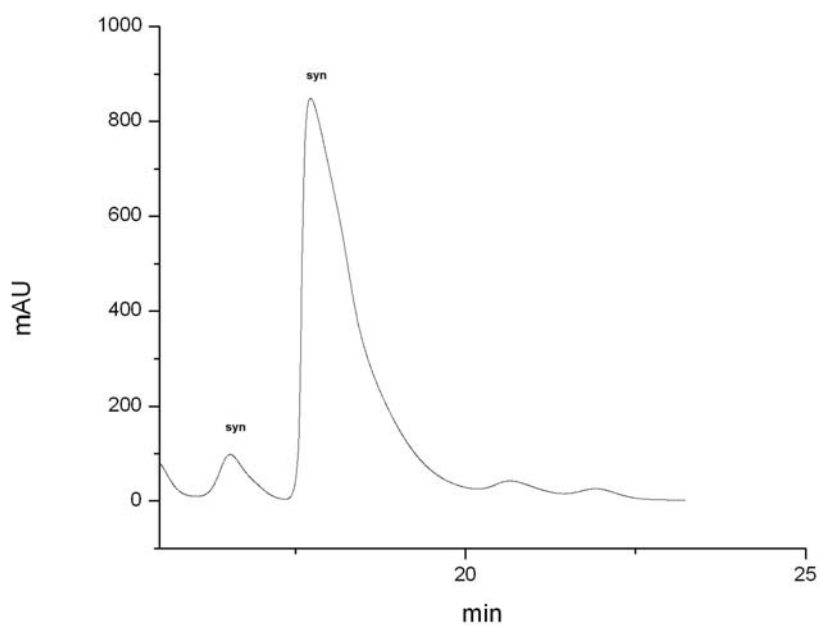

**18 (Table 2, entry 4)**

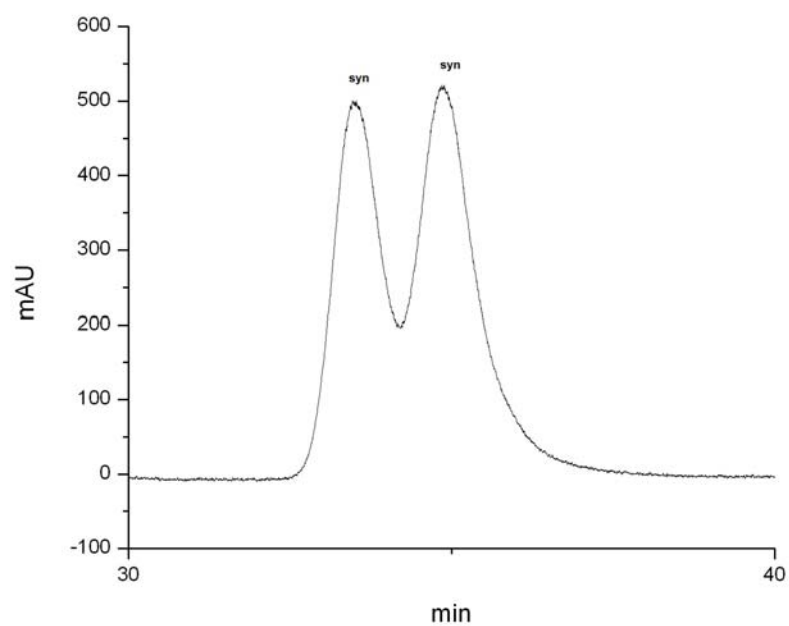

**19 racemic**

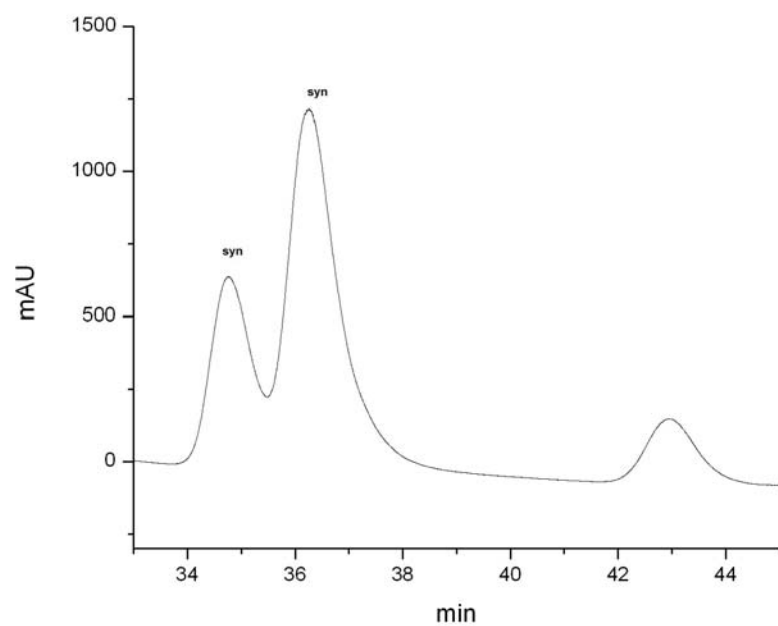

**19 (Table 2, entry 5)**

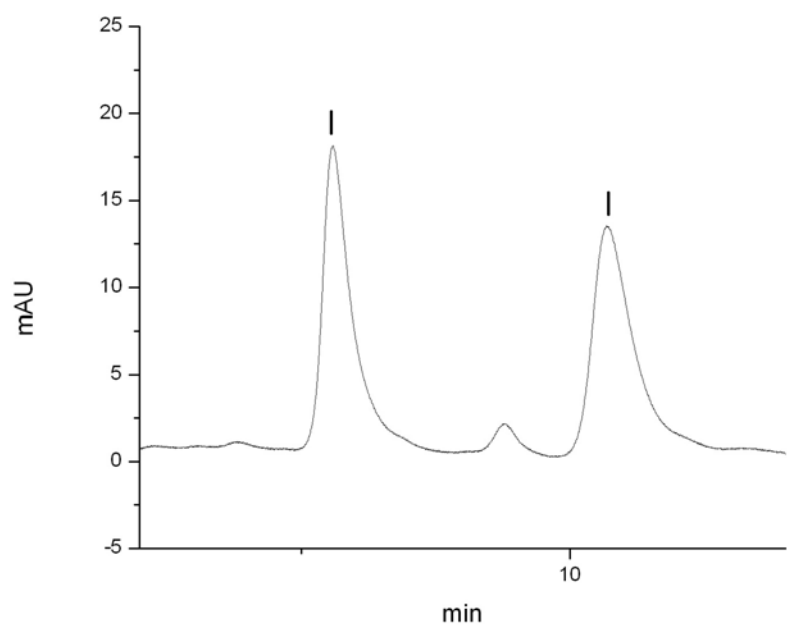

**20 racemic**

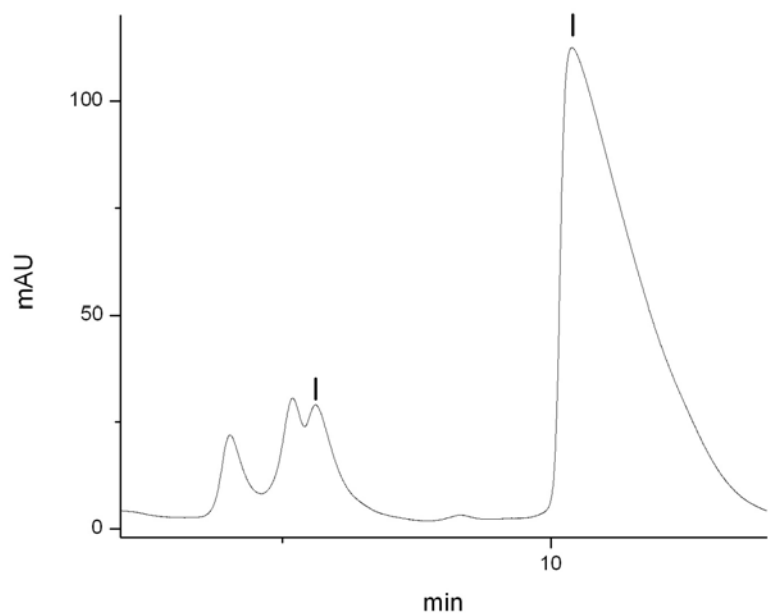

**20 (Table 2, entry 8)**

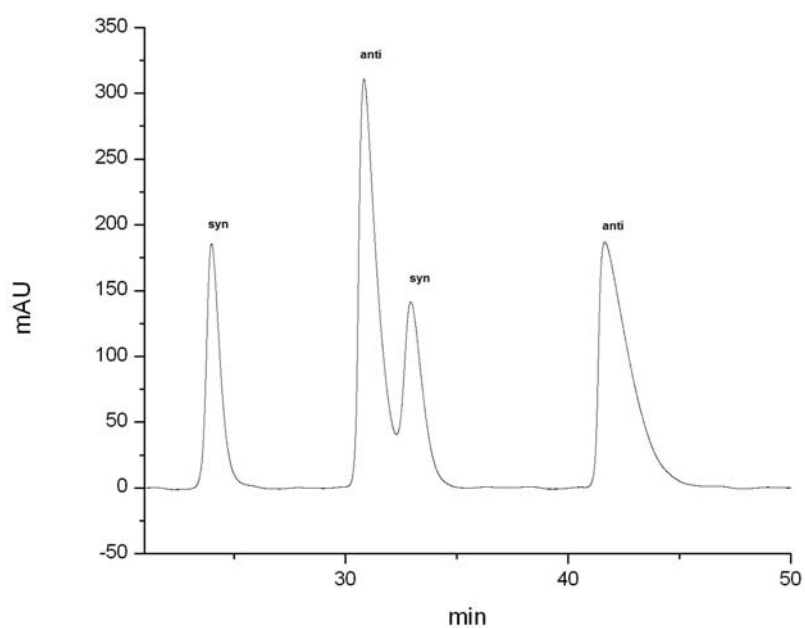

**17b racemic**

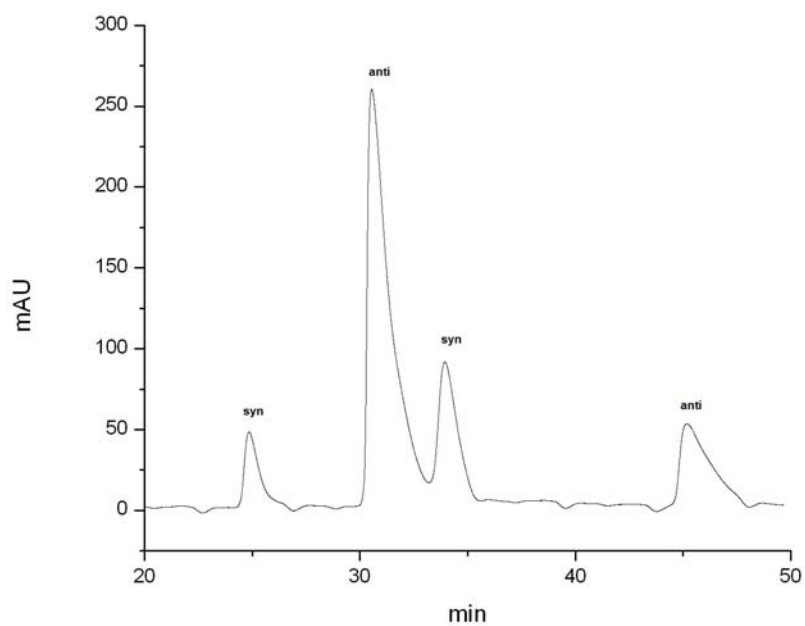

**17b (Table 3, entry 6)**

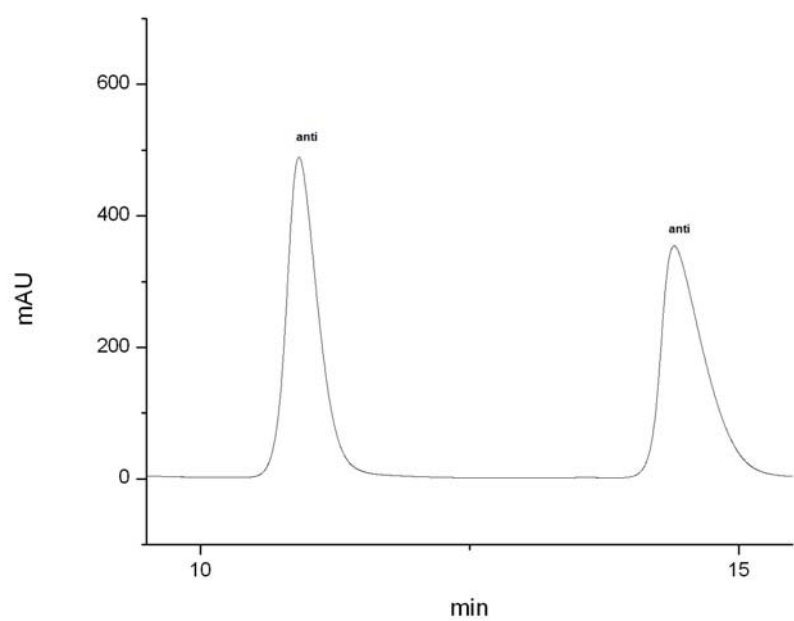

**17c racemic**

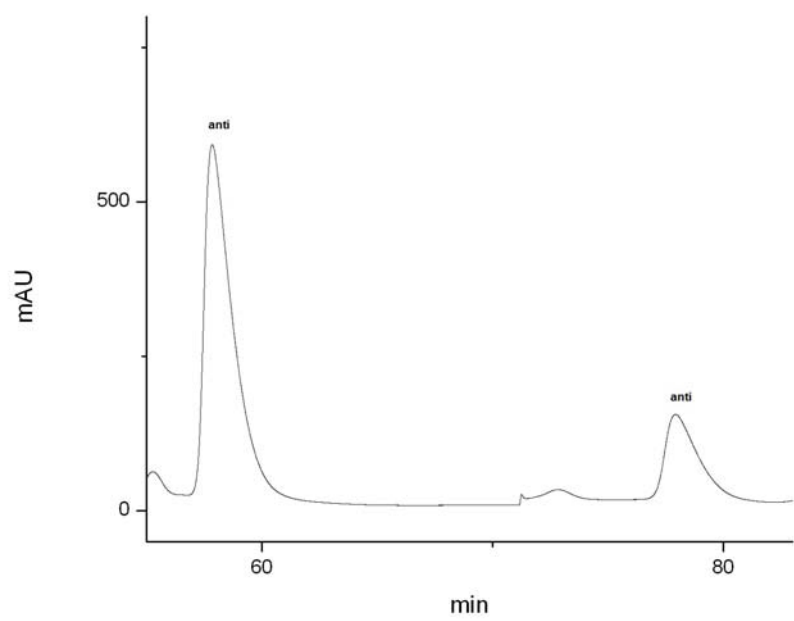

**17c (Table 3, entry 7)**



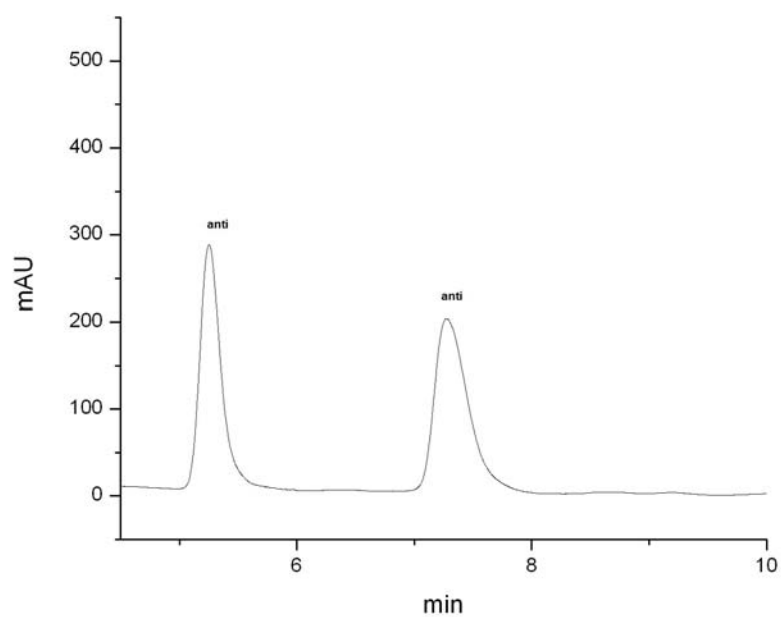

**17d racemic**

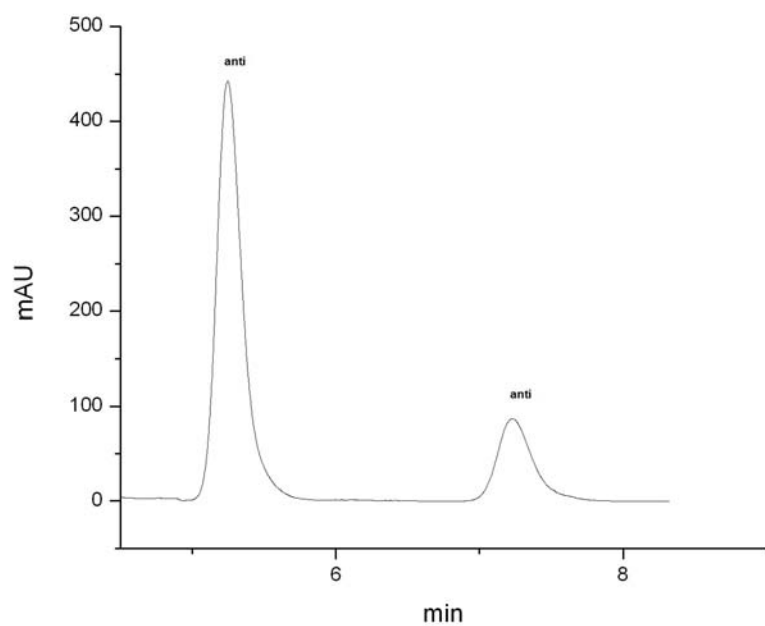

**17d (Table 3, entry 8)**

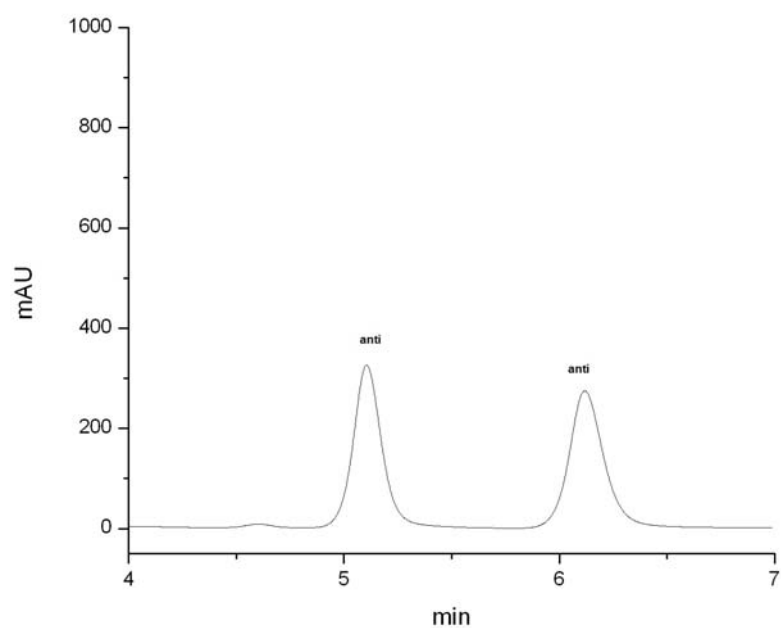

**17e racemic**

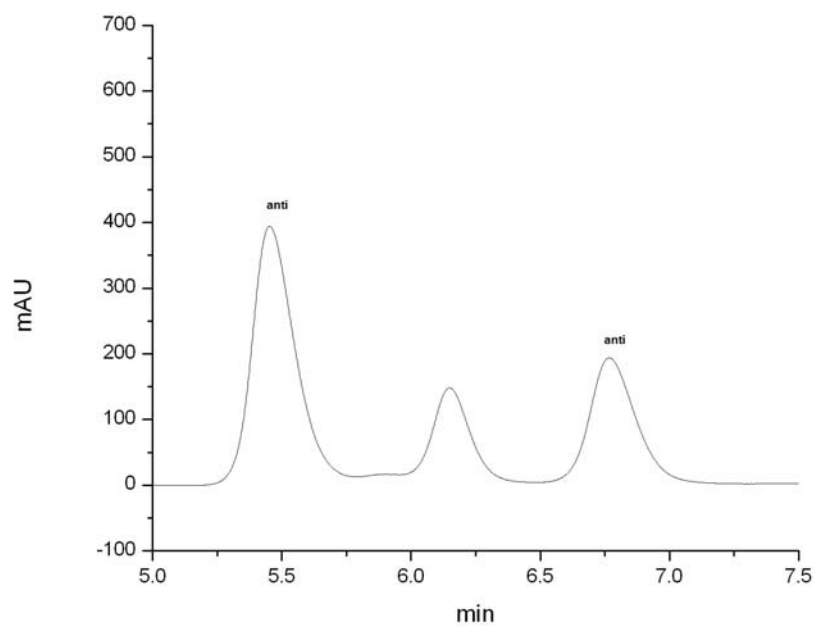

**17e (Table 3, entry 9)**
